# Supplementary material for: Pentacoordinated Organotin(IV) Complexes as an Alternative in the Design of Highly Efficient Optoelectronic and Photovoltaic Devices: Synthesis and Photophysical Characterization
Source: MDPI journal article supplement (doi:10.3390/ijms24065255), 2023-03-09
Supplement: s1 [file s1]

Supplementary Materials

# Pentacoordinated Organotin(IV) Complexes as an Alternative in the Design of Highly Efficient Optoelectronic and Photovoltaic Devices: Synthesis and Photophysical Characterization

María Elena Sánchez Vergara <sup>1,\*</sup>, Elizabeth Gómez <sup>2,\*</sup>, Emiliano Toledo Dircio <sup>1</sup>, José Ramón Álvarez-Bada <sup>1</sup>, Samuel Cuenca Pérez <sup>2</sup>, José Miguel Galván Hidalgo <sup>2</sup>, Arturo González Hernández <sup>2</sup> and Simón Hernández Ortega <sup>2</sup>

<sup>1</sup> Facultad de Ingeniería, Universidad Anáhuac México, Avenida Universidad Anáhuac 46, Col. Lomas Anáhuac, Huixquilucan, Estado de México 52786, México.

<sup>2</sup> Instituto de Química, Universidad Nacional Autónoma de México, Circuito Exterior s/n. C.U., Alcaldía Coyoacán, 04510. Ciudad de México, México.

Table S1. Characteristic IR stretching frequencies of compounds 1a-1d

| Compound  | $\nu(\text{C}=\text{N})$ | $\nu(\text{Sn}-\text{C})$ | $\nu(\text{Sn}-\text{O})$ | $\nu(\text{Sn}-\text{N})$ |
|-----------|--------------------------|---------------------------|---------------------------|---------------------------|
| <b>1a</b> | 1601                     | 606                       | 548                       | 483                       |
| <b>1b</b> | 1601                     | 607                       | 550                       | 485                       |
| <b>1c</b> | 1599                     | 601                       | 548                       | 488                       |
| <b>1d</b> | 1602                     | 603                       | 549                       | 488                       |

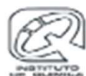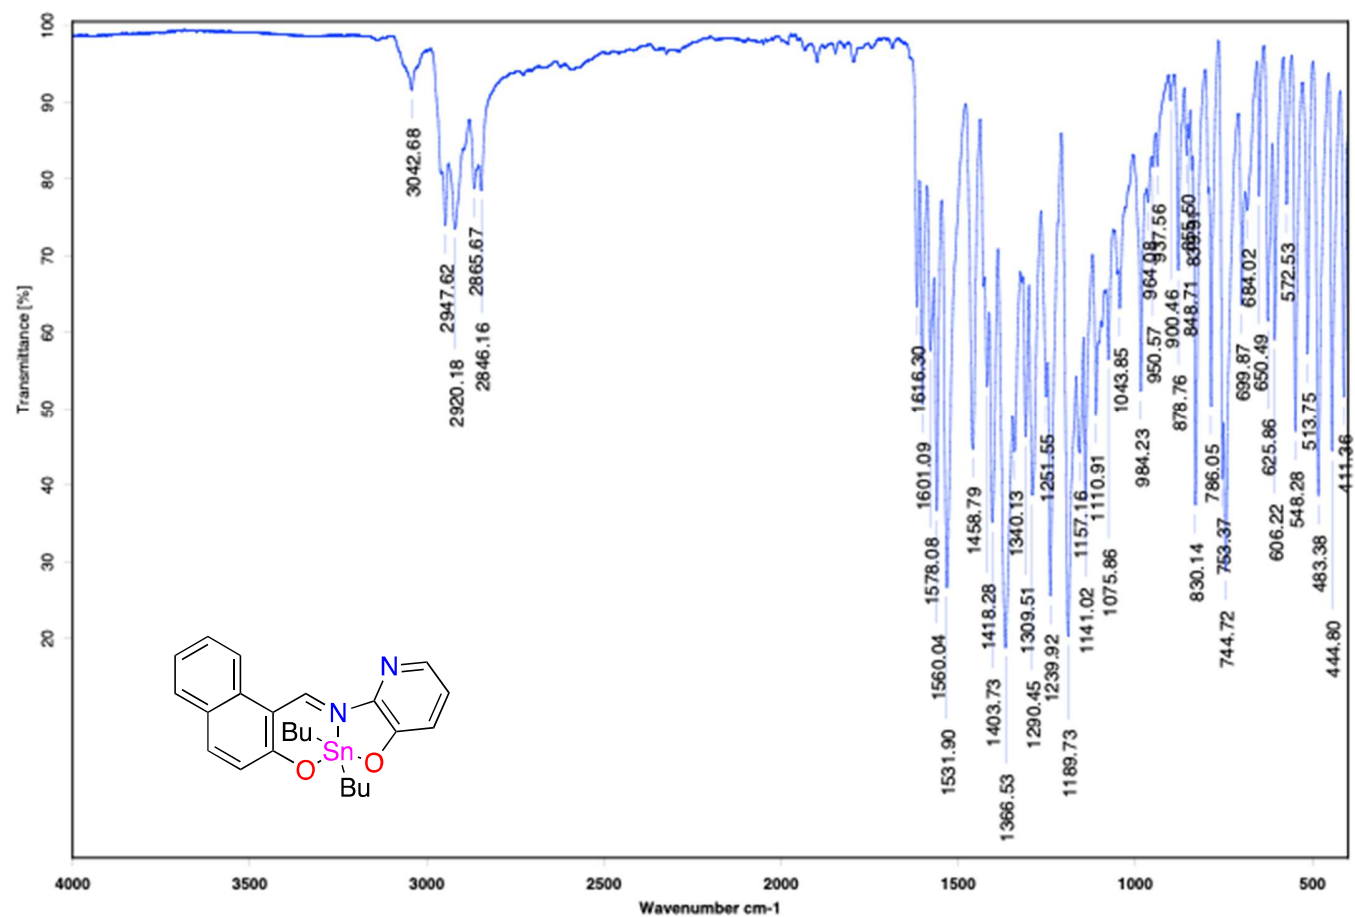

Figure S1. ATR-IR of complex **1a**

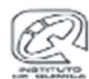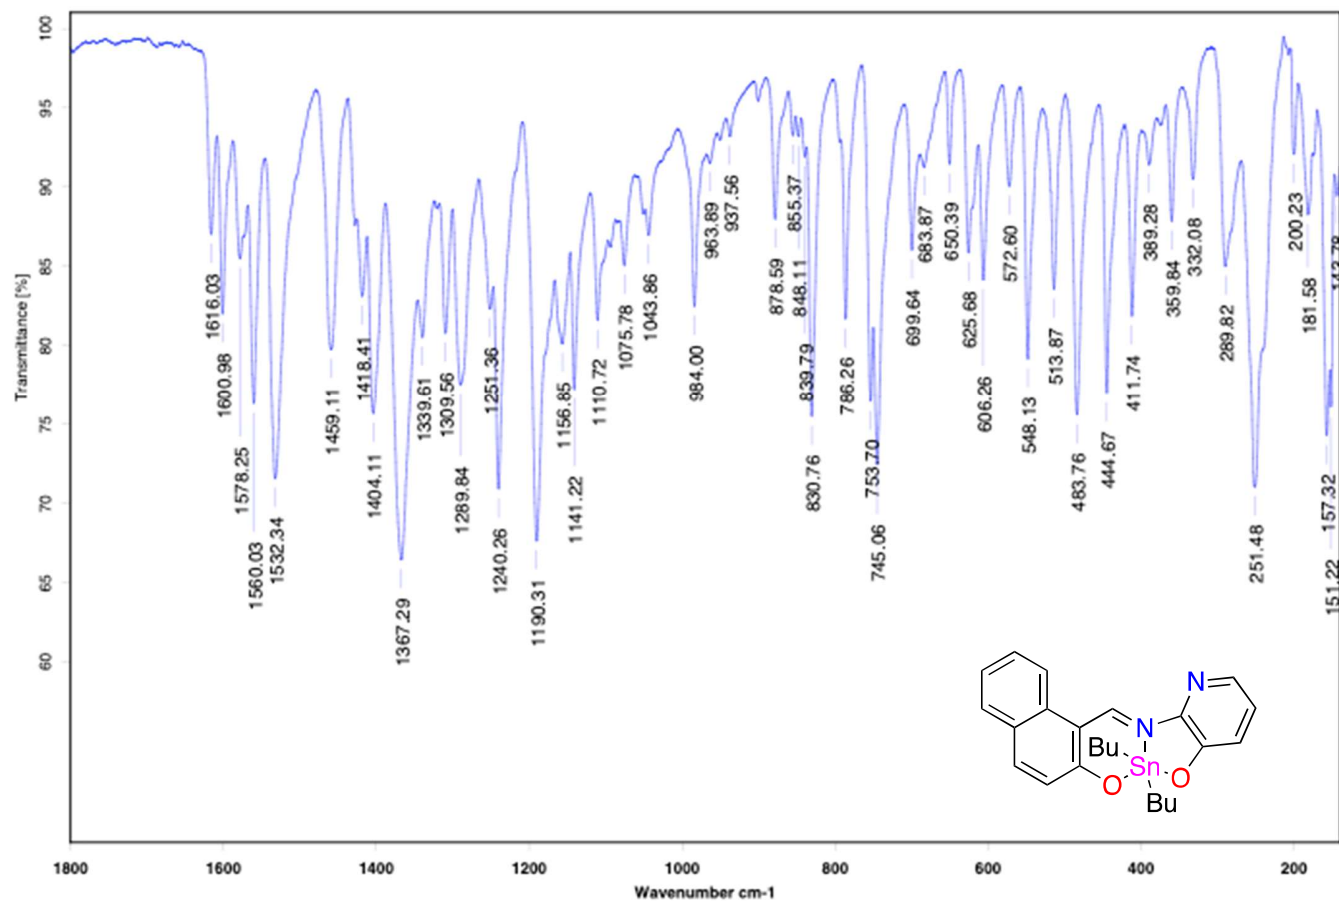

Figure S2. Far-IR of complex **1a**

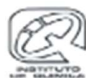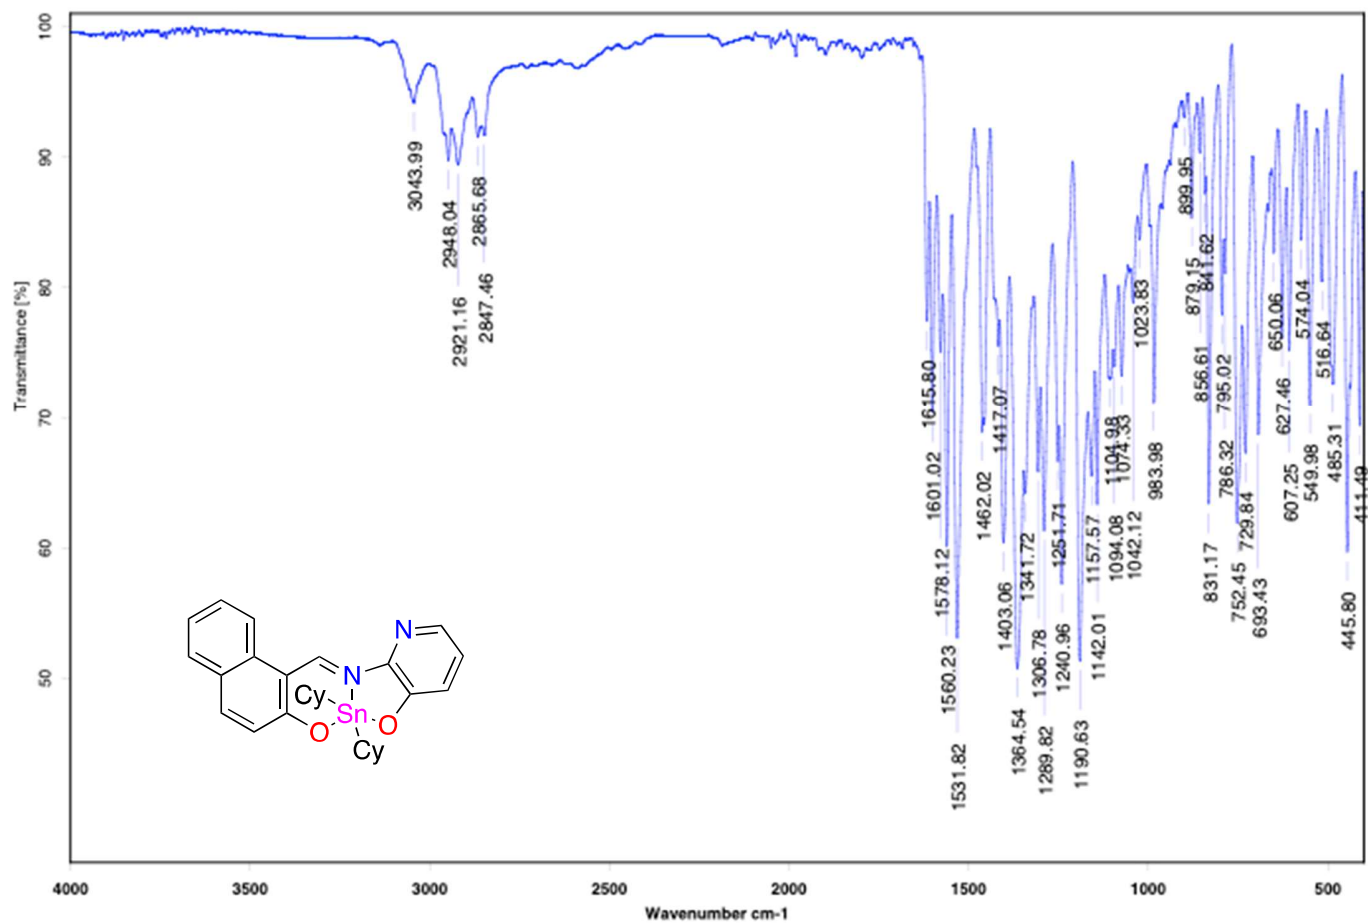

Figure S3. ATR-IR of complex **1b**

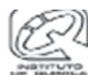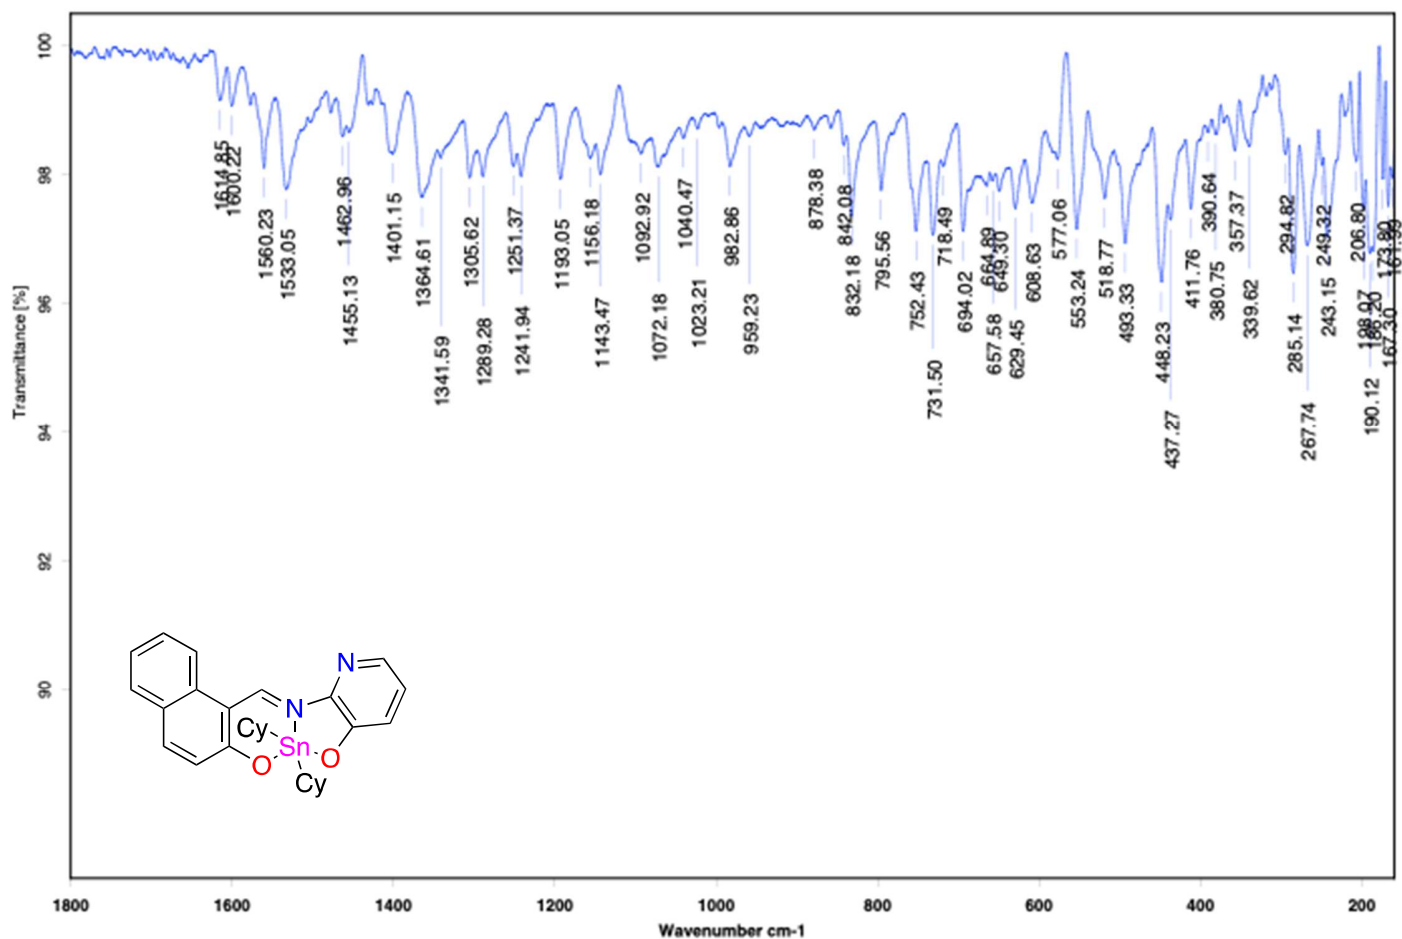

Figure S4. Far-IR of complex **1b**

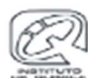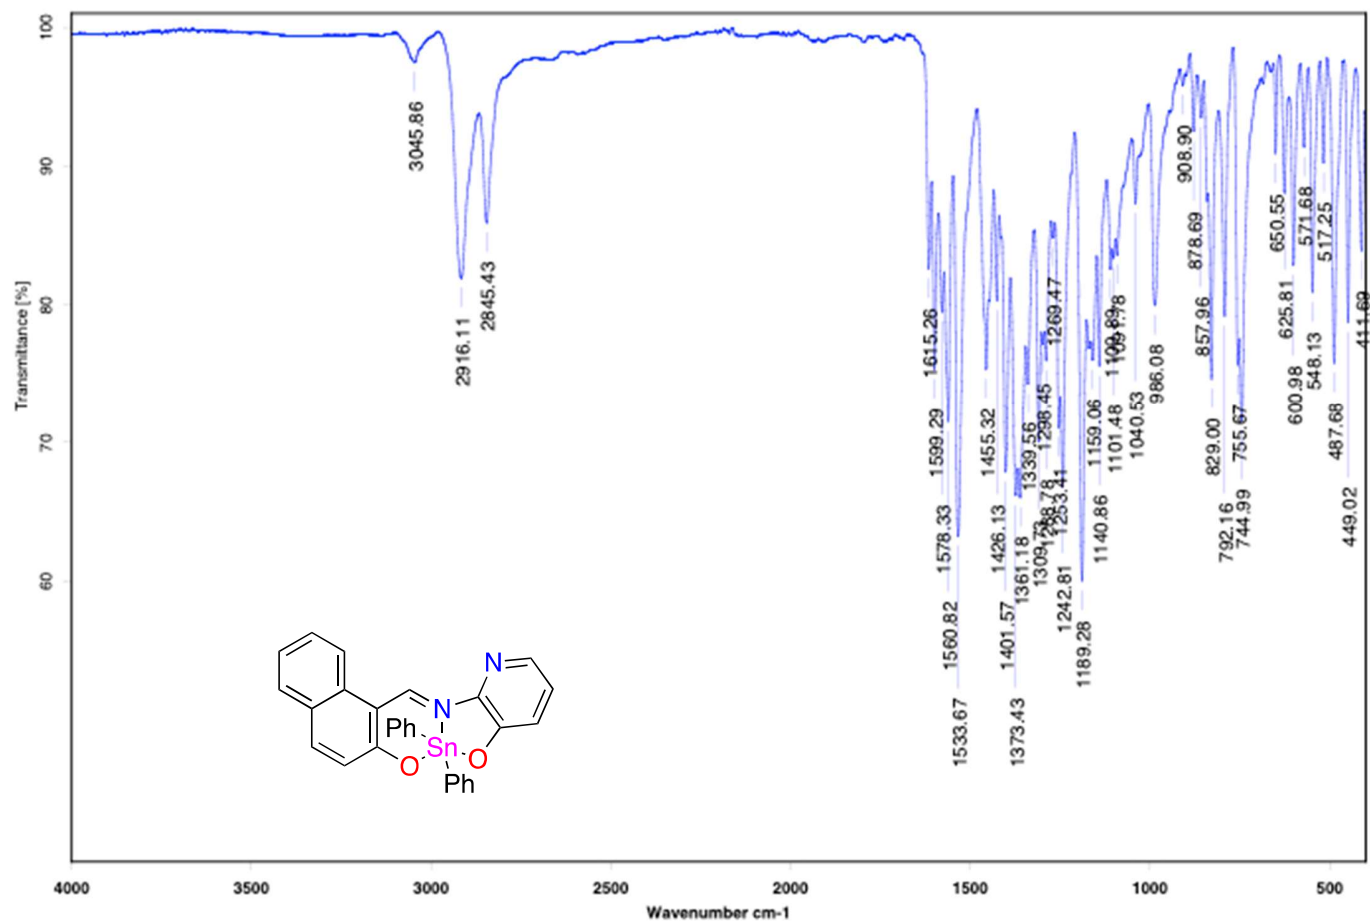

Figure S5. ATR-IR of complex 1c

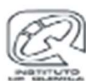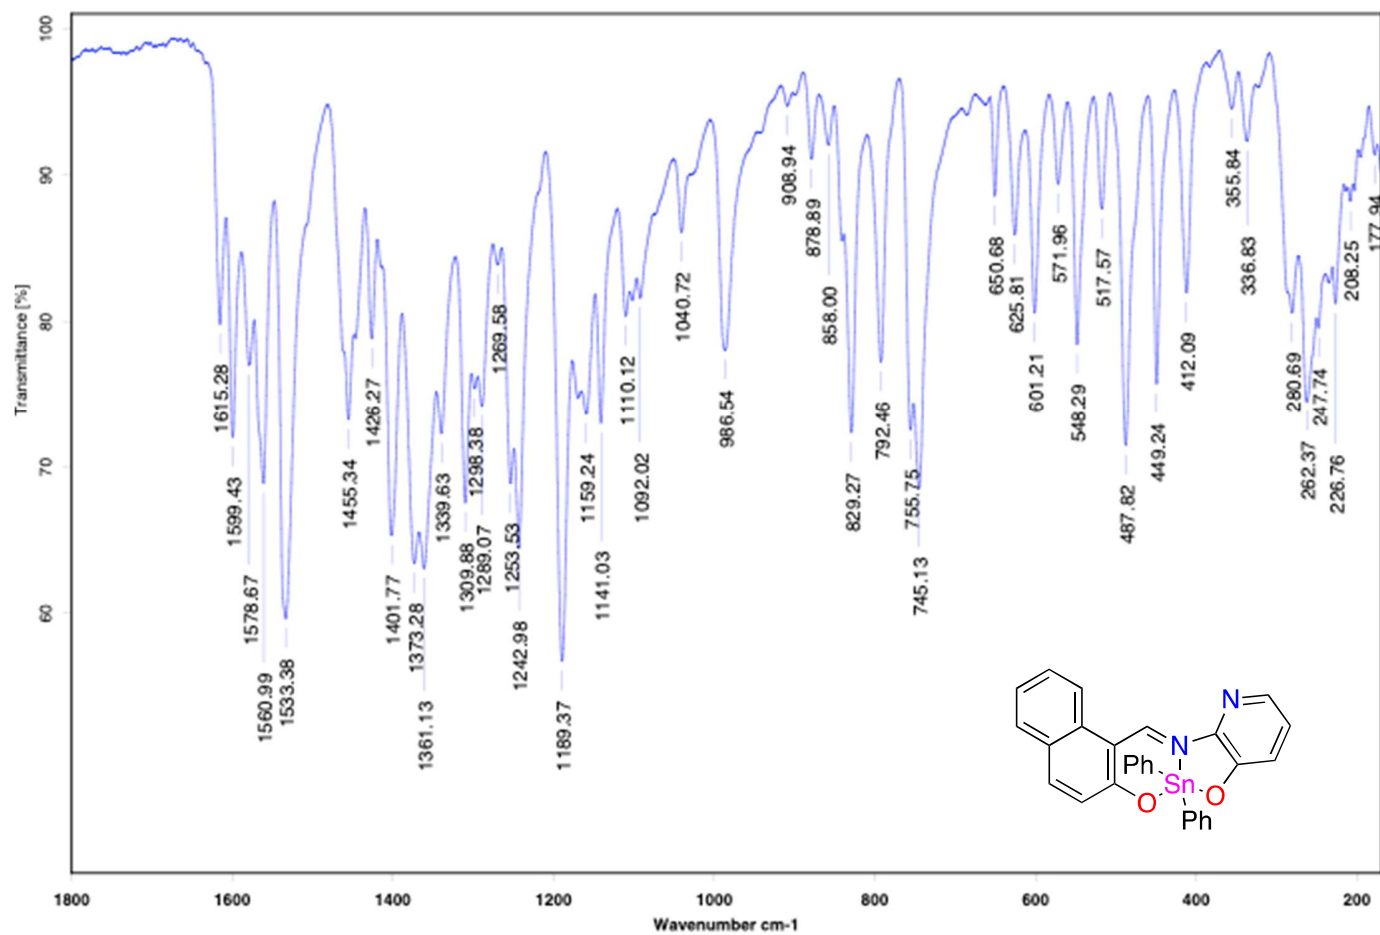

Figure S6. Far-IR of complex 1c

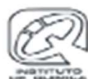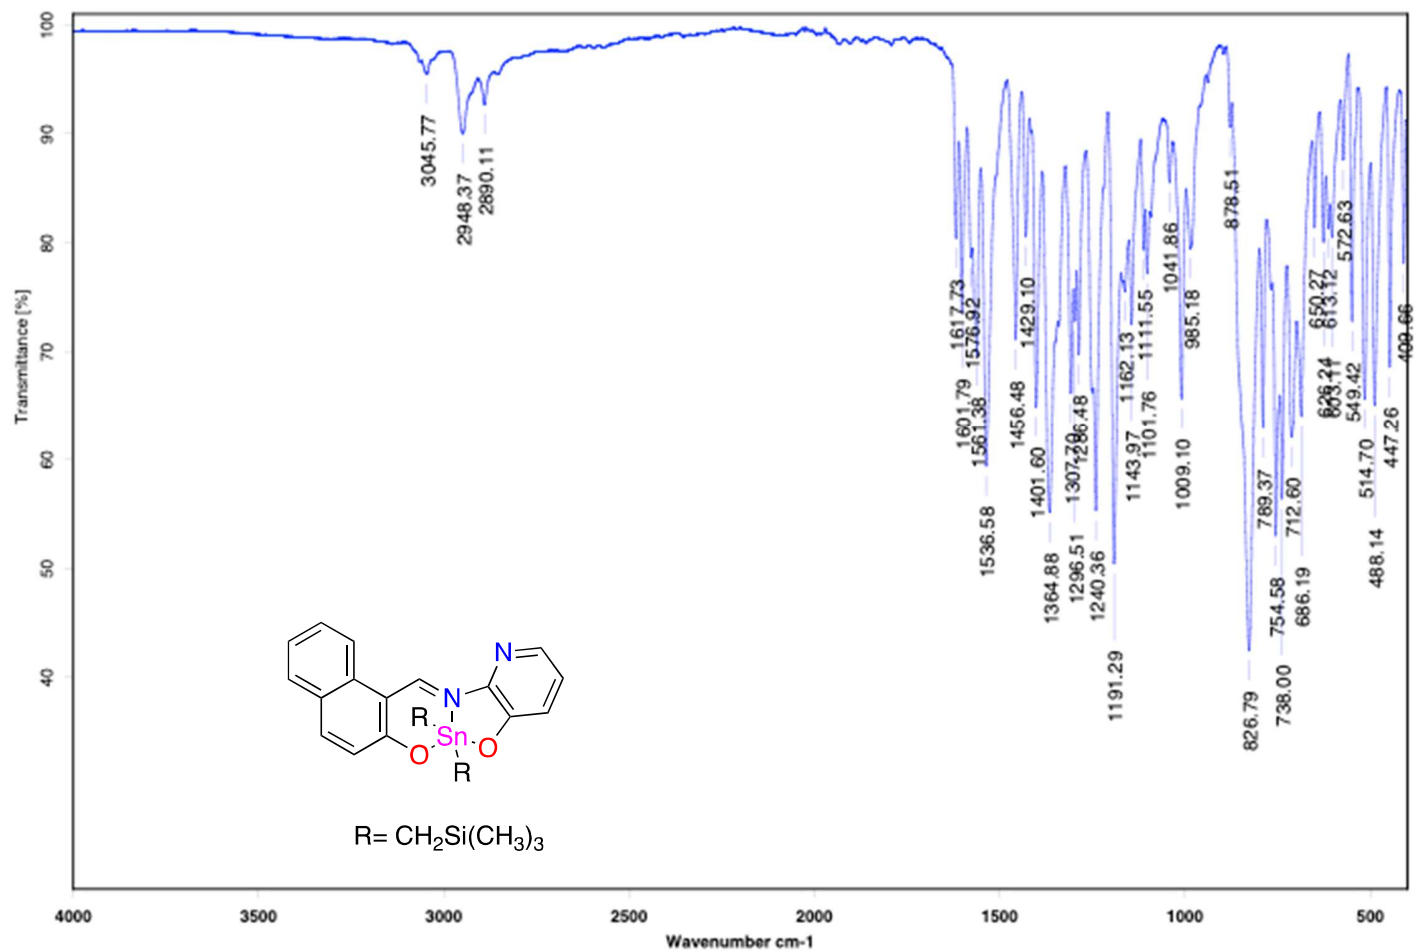

Figure S7. ATR-IR of complex **1d**



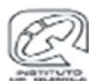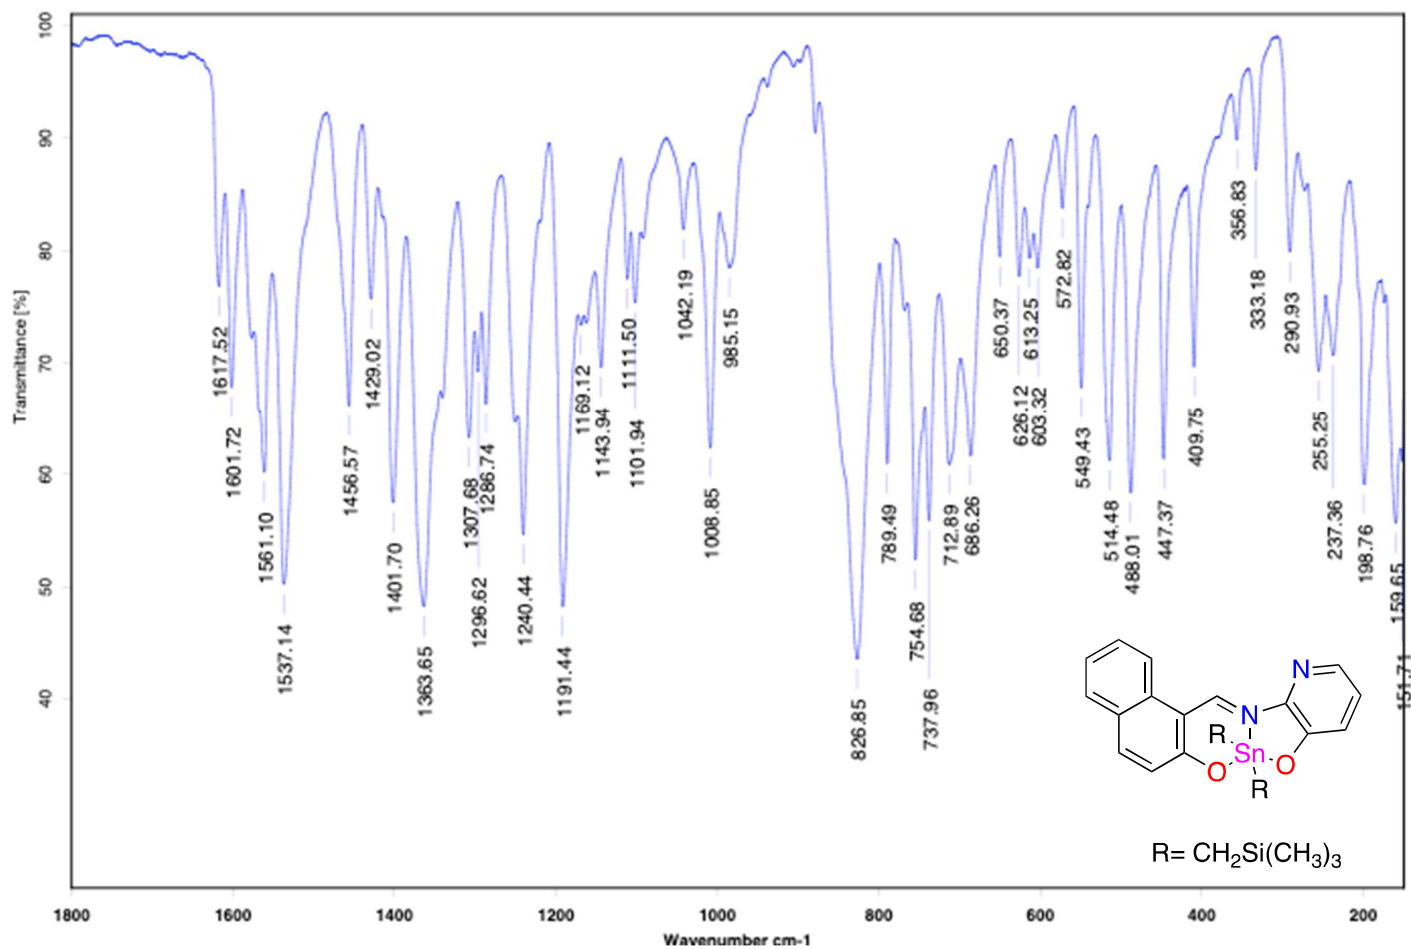

Figure S8. ATR-IR of complex **1d**

INSTITUTO DE QUIMICA, UNAM  
LABORATORIO DE ESPECTROMETRIA DE MASAS

Acq. Data Name: U-2992 SCP3a  
Creation Parameters: Average(MS[1] Time:3..3)  
Elizabeth Gomez / Samuel Cuenca

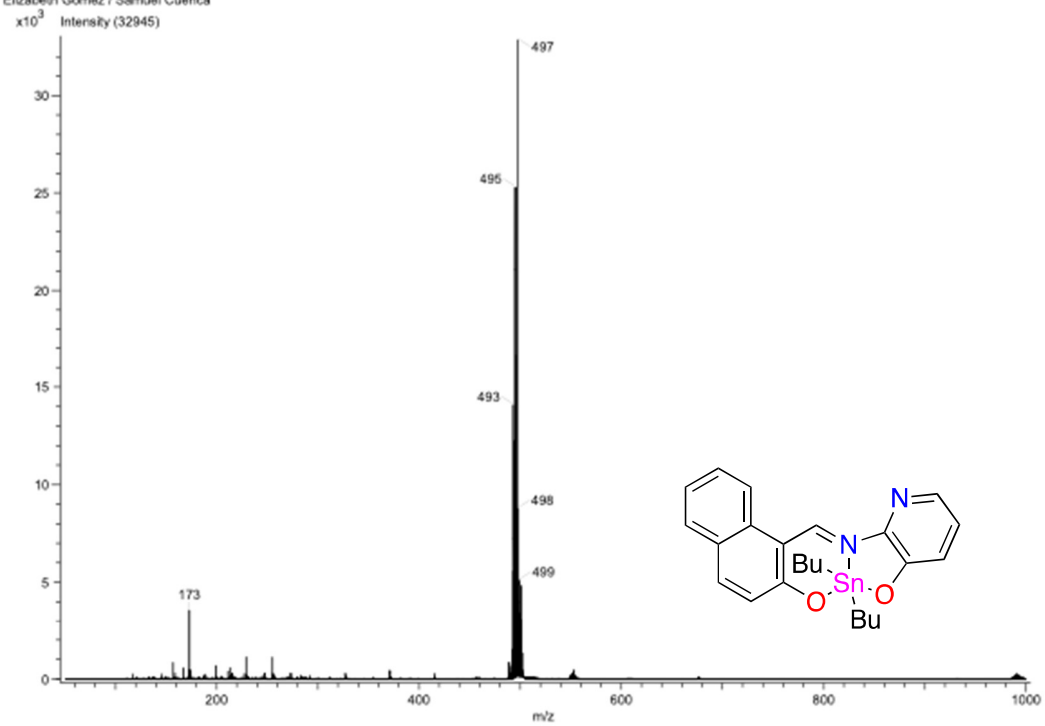

Figure S9. Mass Spectrometry (DART<sup>+</sup>) of complex **1a**

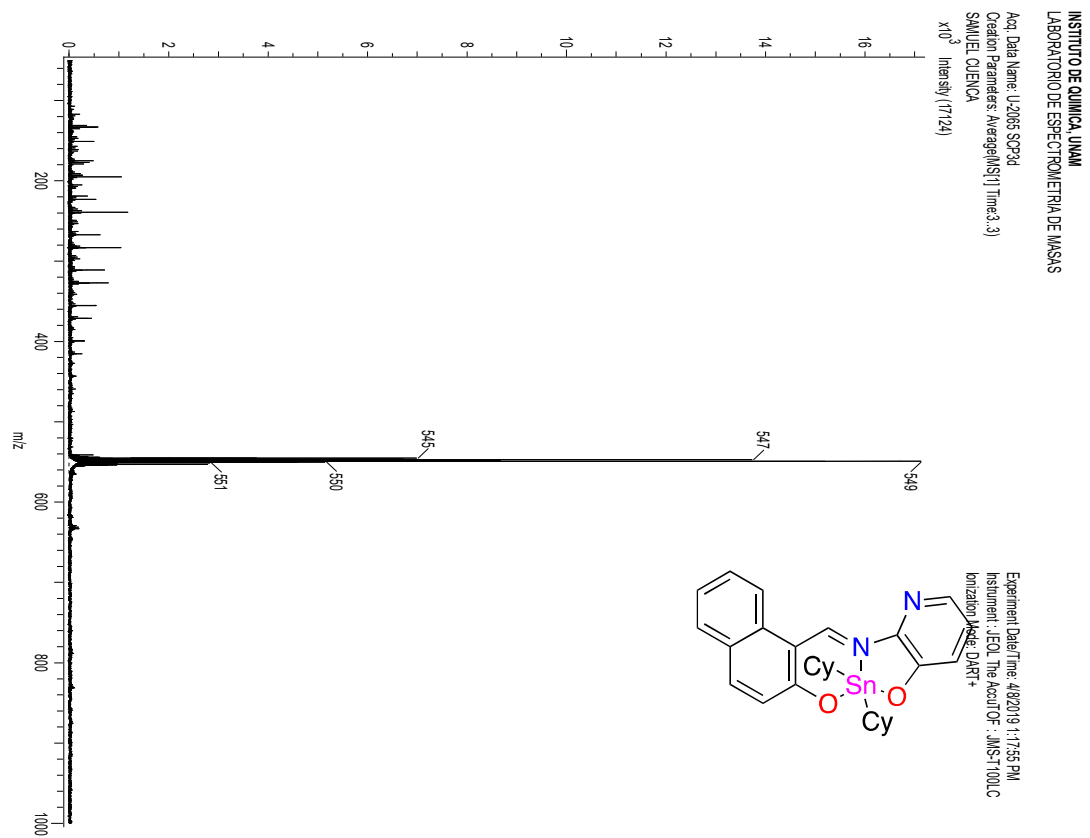

Figure S10. Mass Spectrometry (DART<sup>+</sup>) of complex **1b**

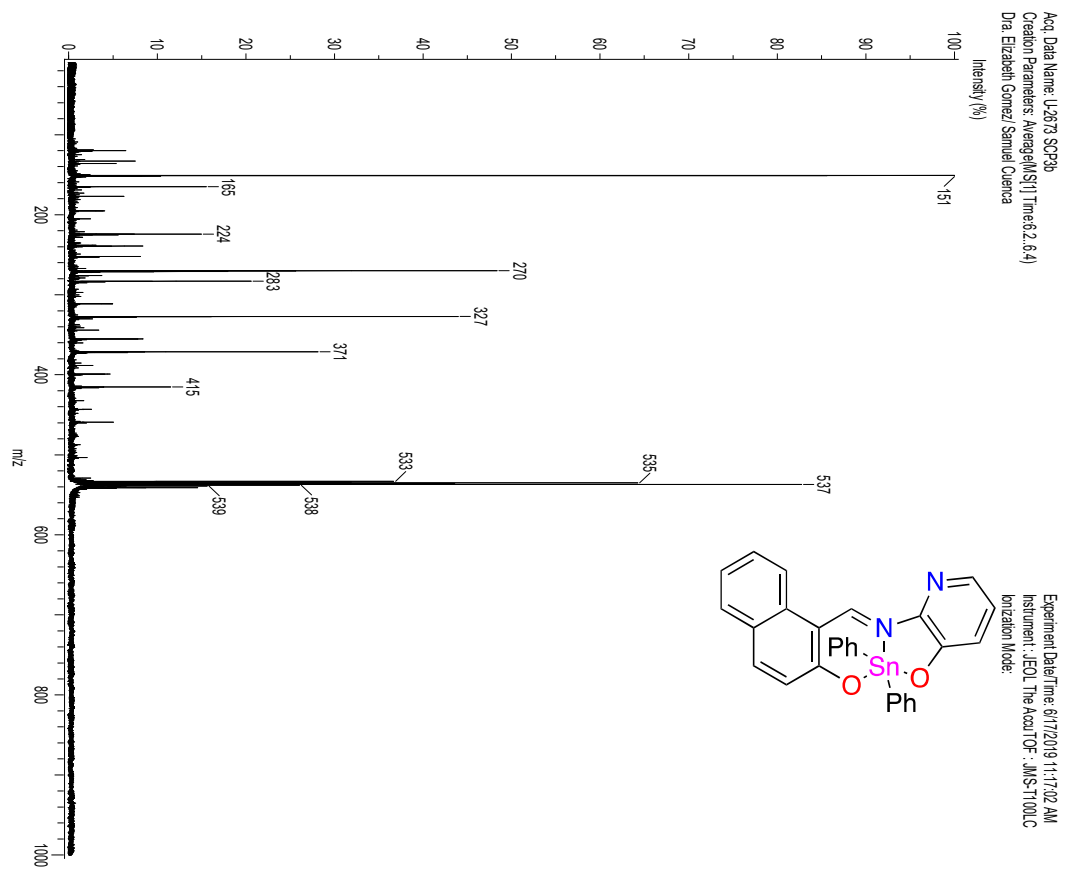

Figure S11. Mass Spectrometry (DART<sup>+</sup>) of complex **1c**

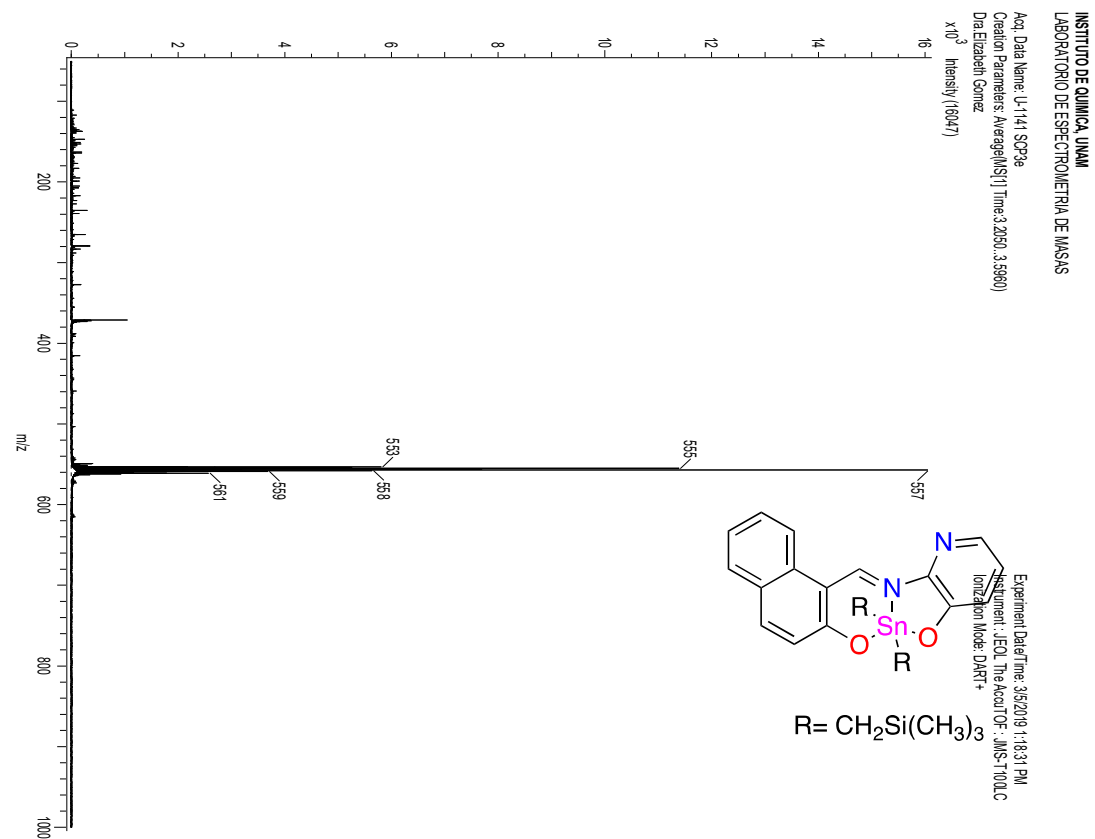

Figure S12. Mass Spectrometry (DART<sup>+</sup>) of complex **1d**

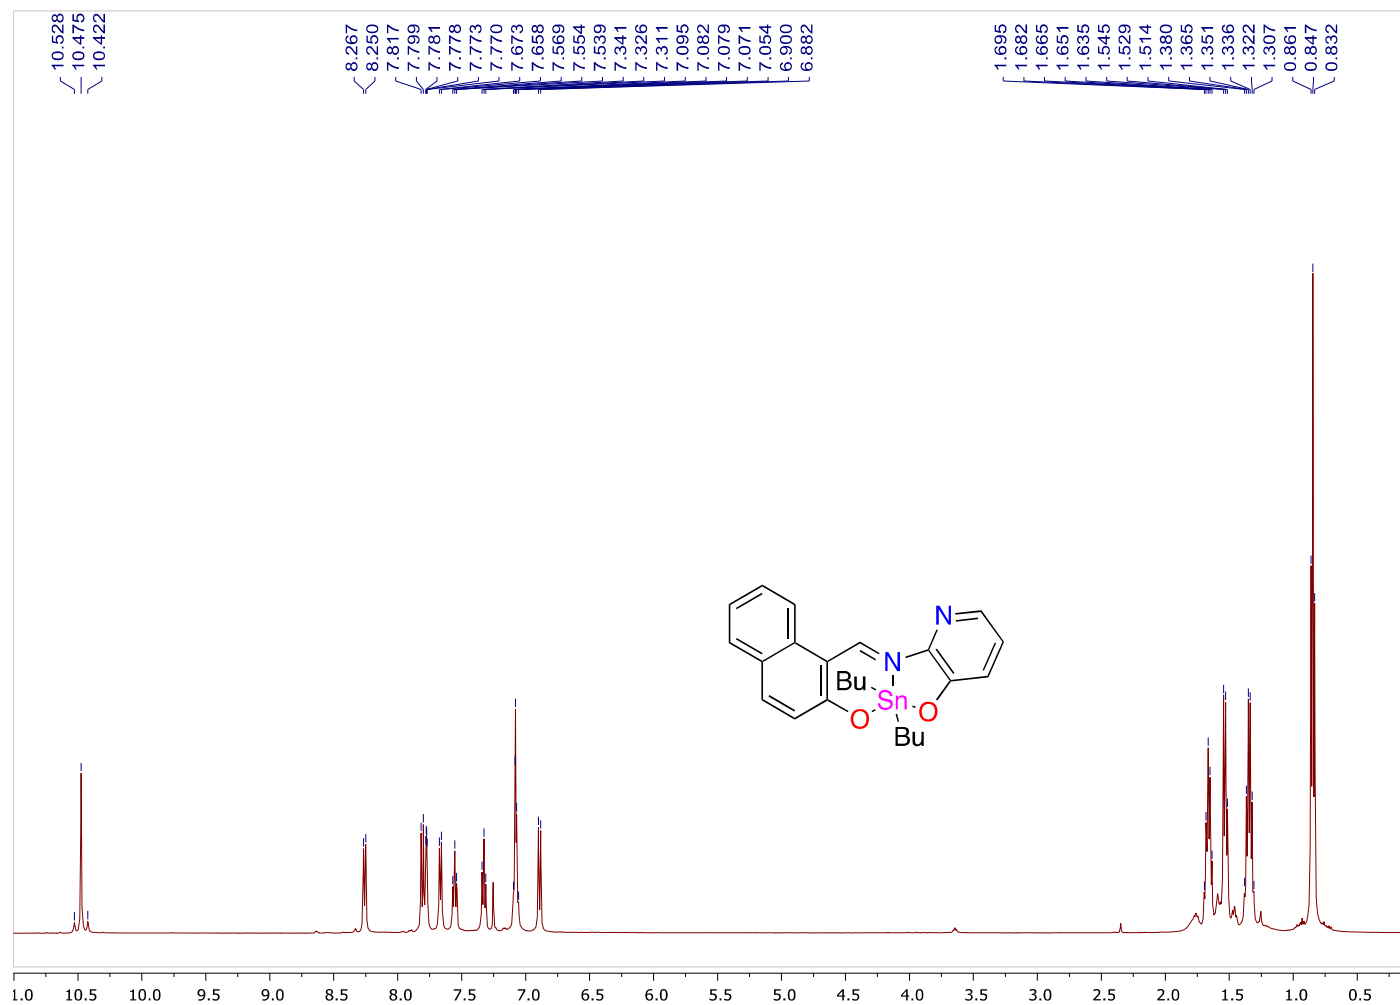

Figure S13.  $^1\text{H}$  NMR ( $\text{CDCl}_3$ , 500 MHz) of complex **1a**



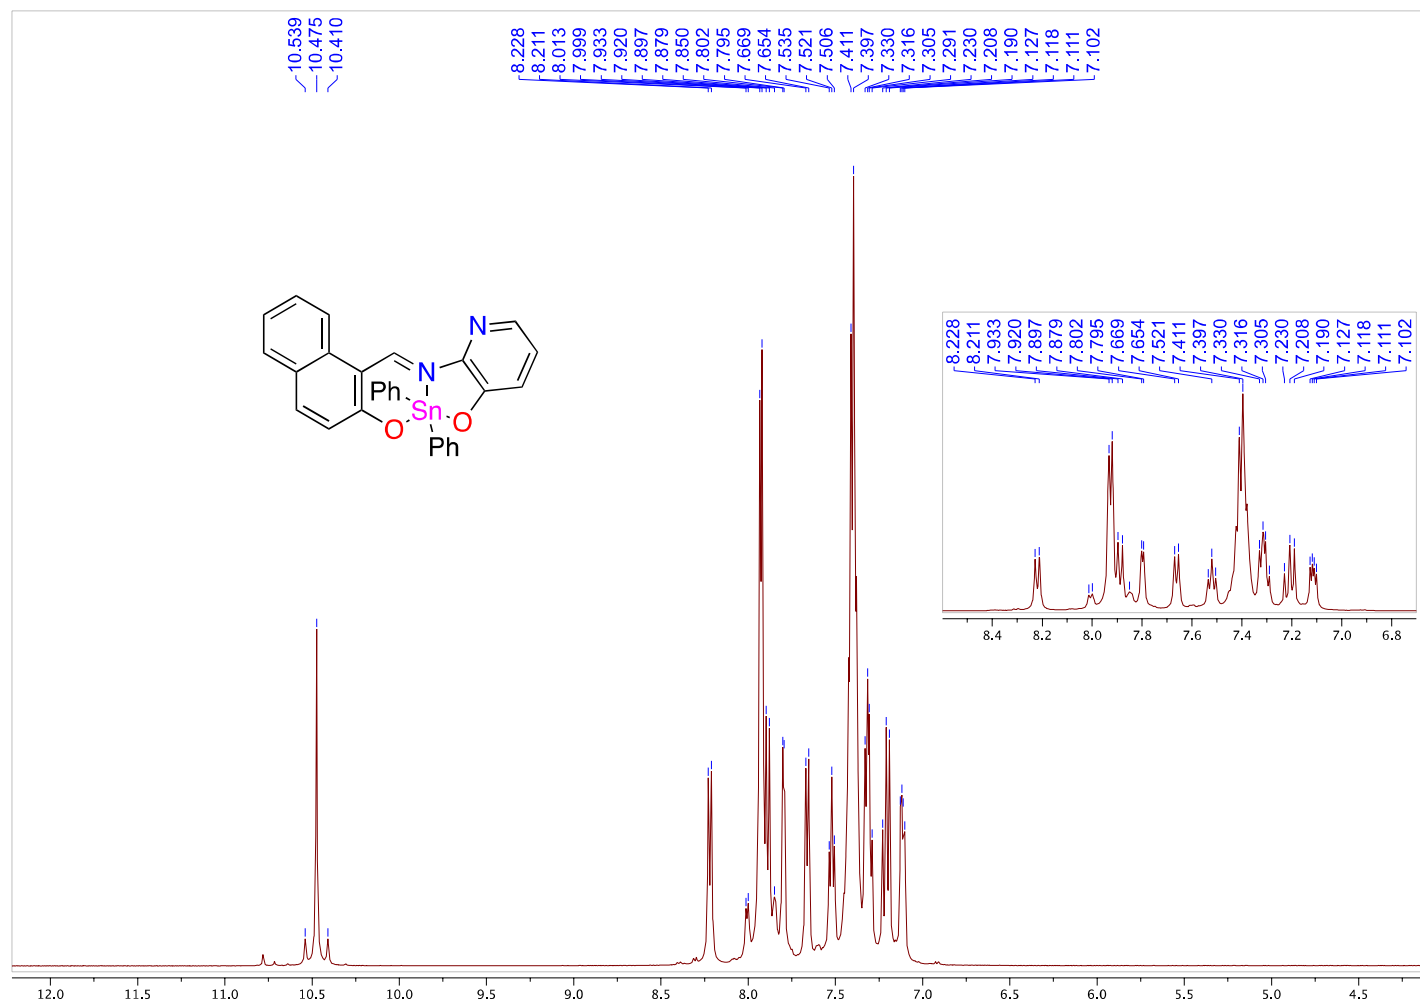

Fig. S15.  $^1\text{H}$  NMR (CDCl<sub>3</sub>, 500 MHz) of complex **1c**



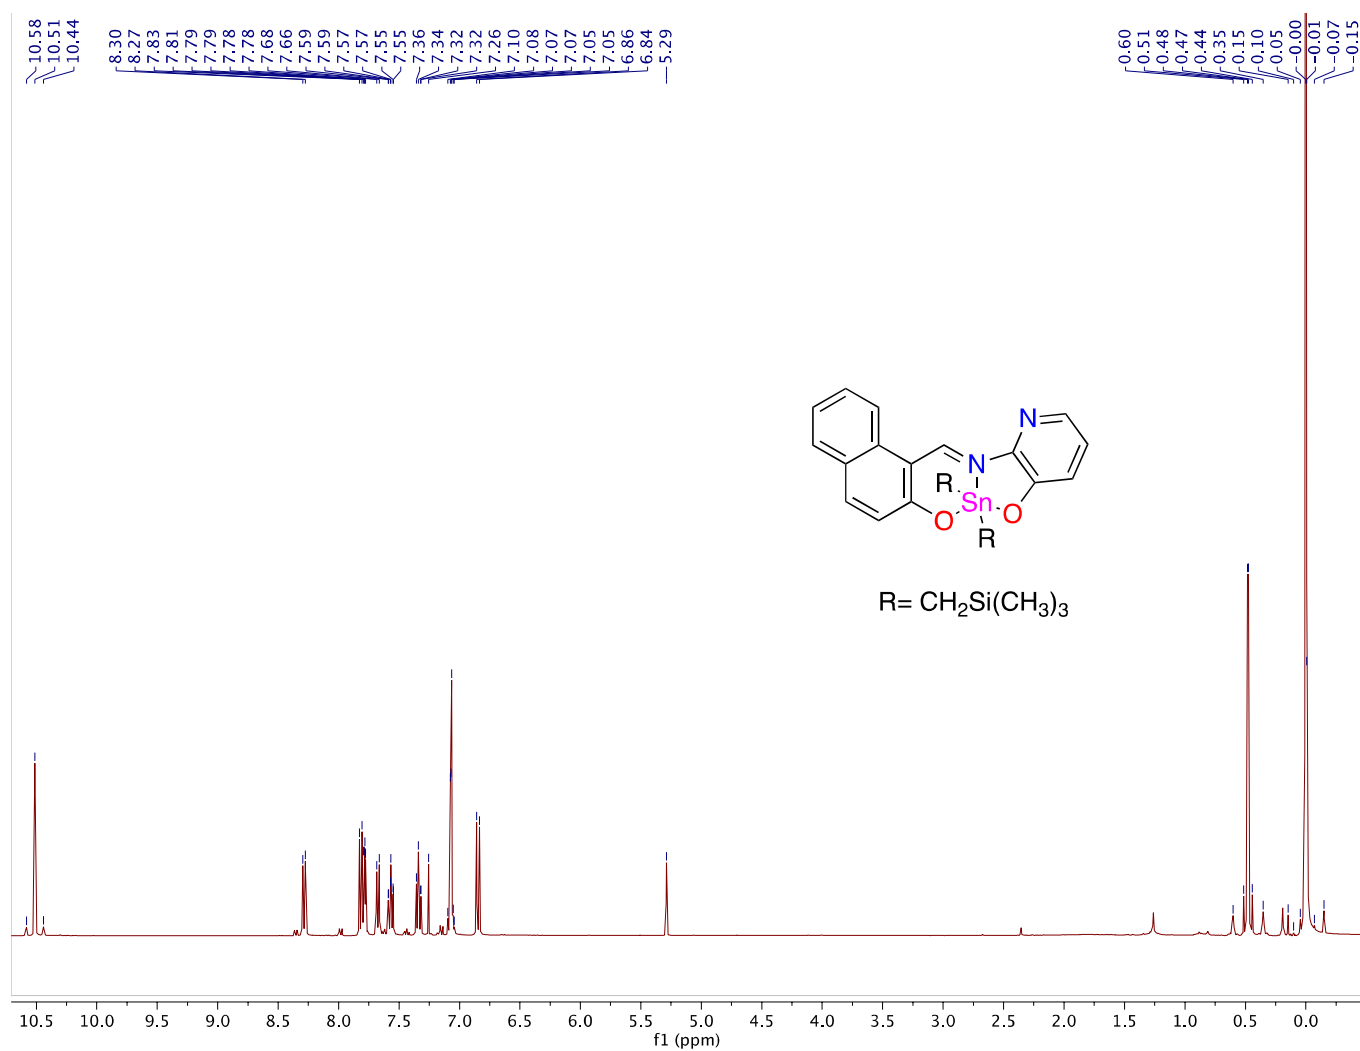

Figure S16.  $^1\text{H}$  NMR ( $\text{CDCl}_3$ , 400 MHz) of complex **1d**

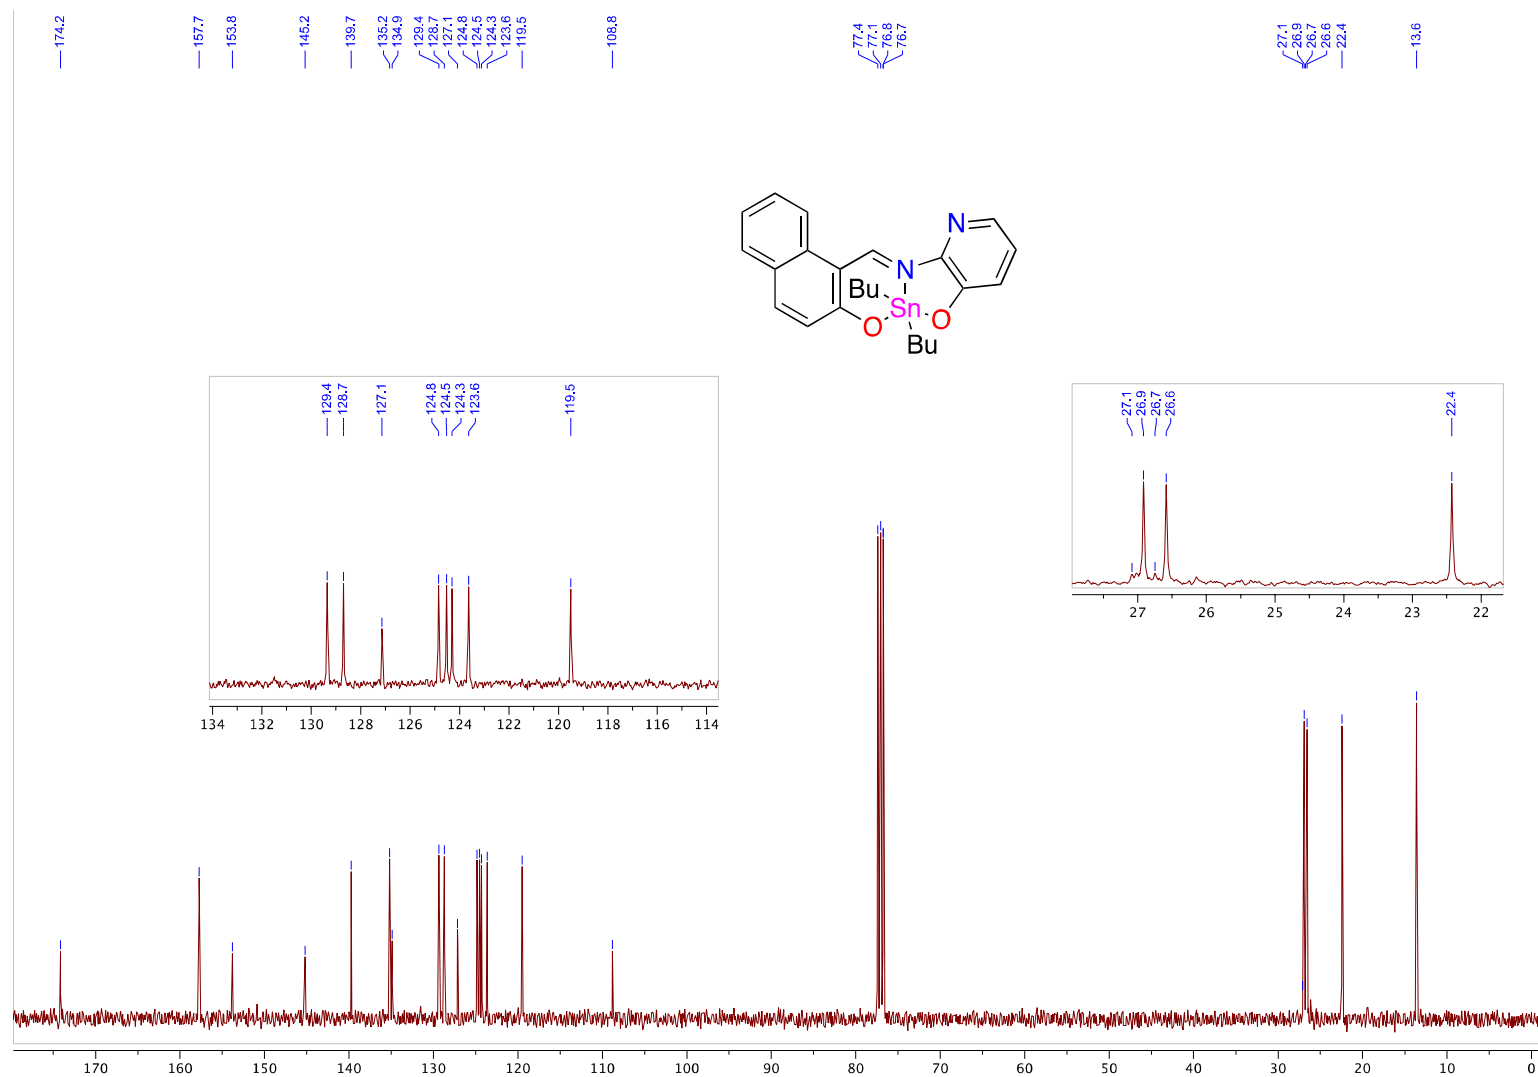

Figure S17. <sup>13</sup>CNMR (CDCl<sub>3</sub>, 100 MHz) of complex **1a**

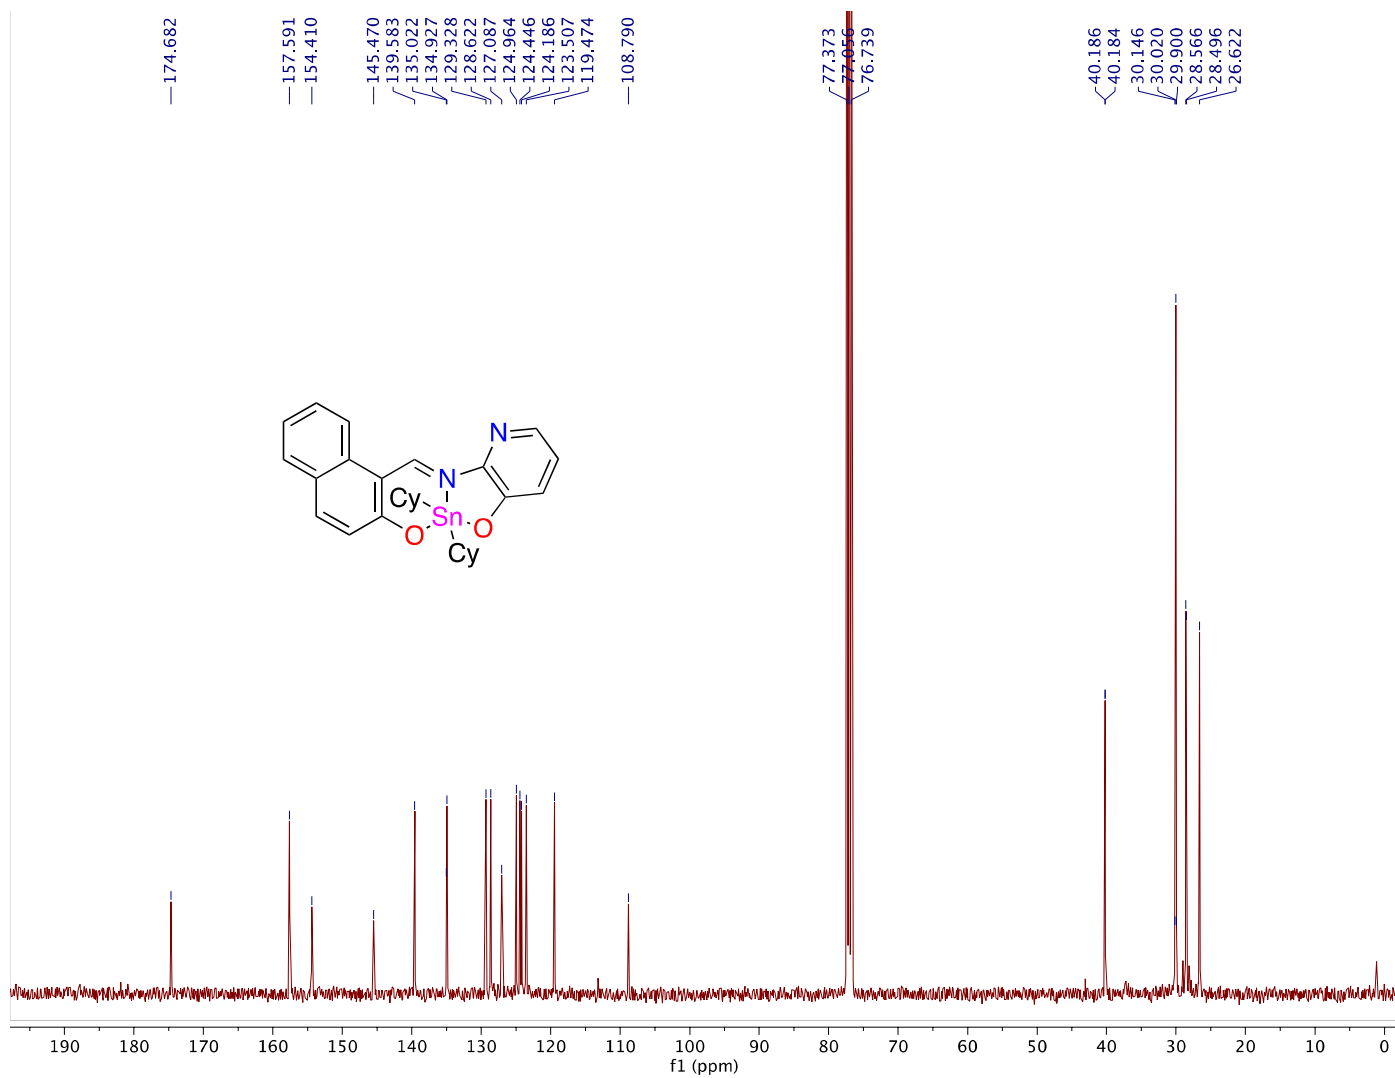

Figure S18.  $^{13}\text{C}$ NMR ( $\text{CDCl}_3$ , 100 MHz) of complex **1b**

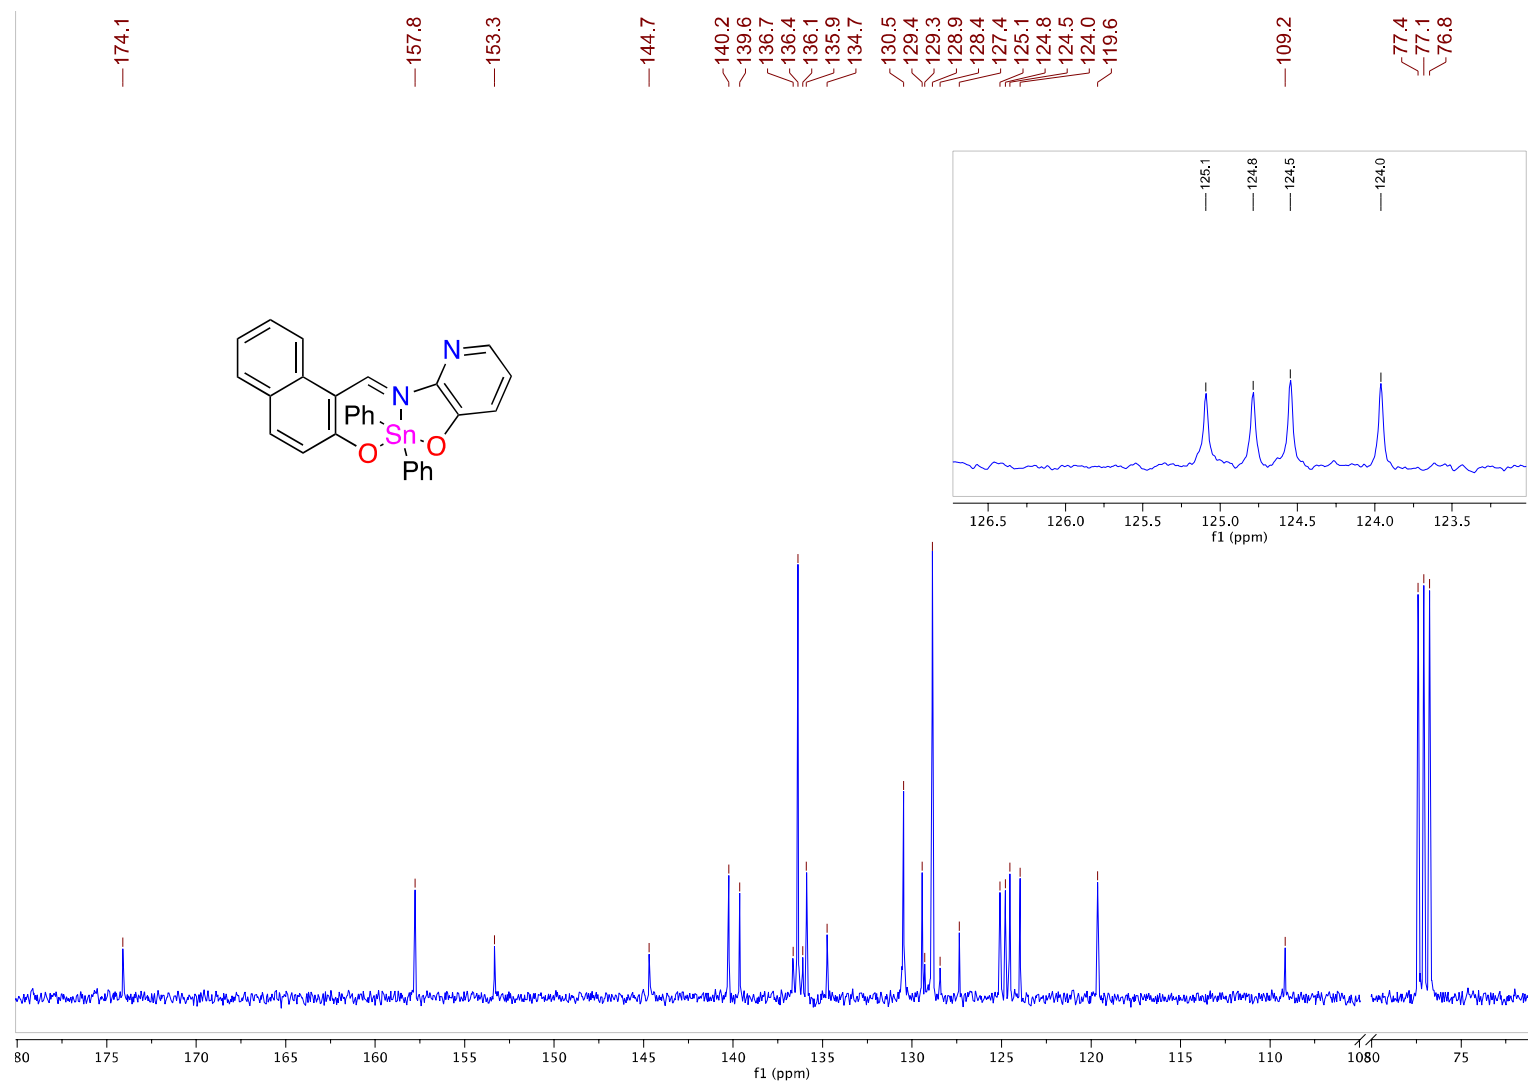

Figure S19. <sup>13</sup>C NMR (CDCl<sub>3</sub>, 100 MHz) complex **1c**

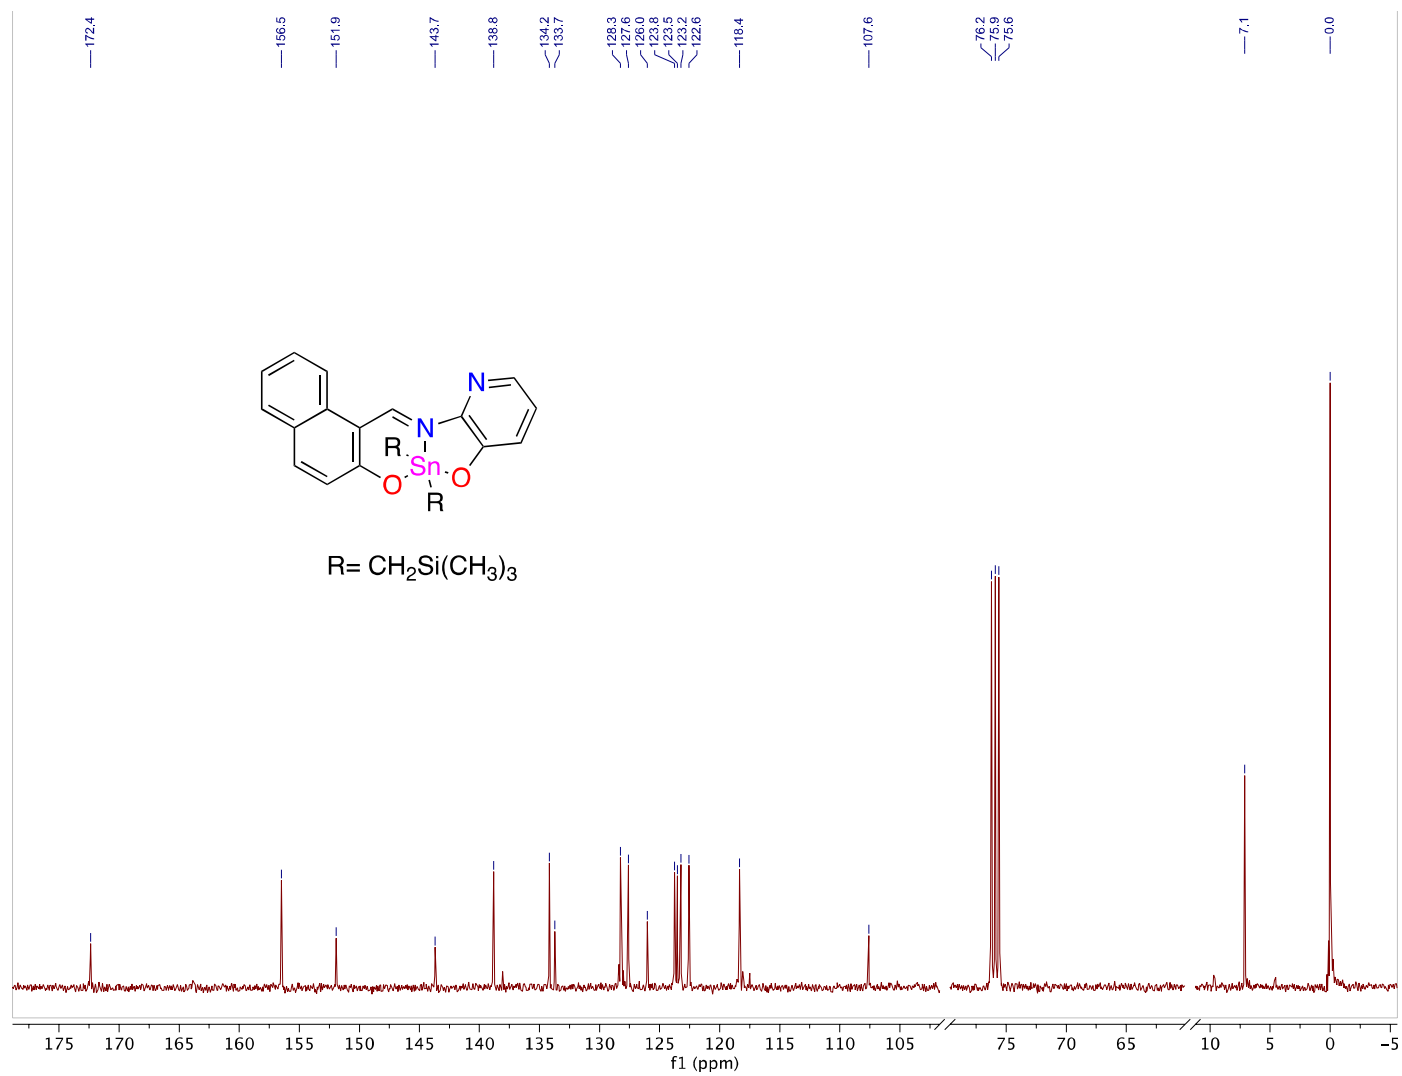

Figure S20.  $^{13}\text{C}$  NMR (CDCl<sub>3</sub>, 100 MHz) of complex **1d**

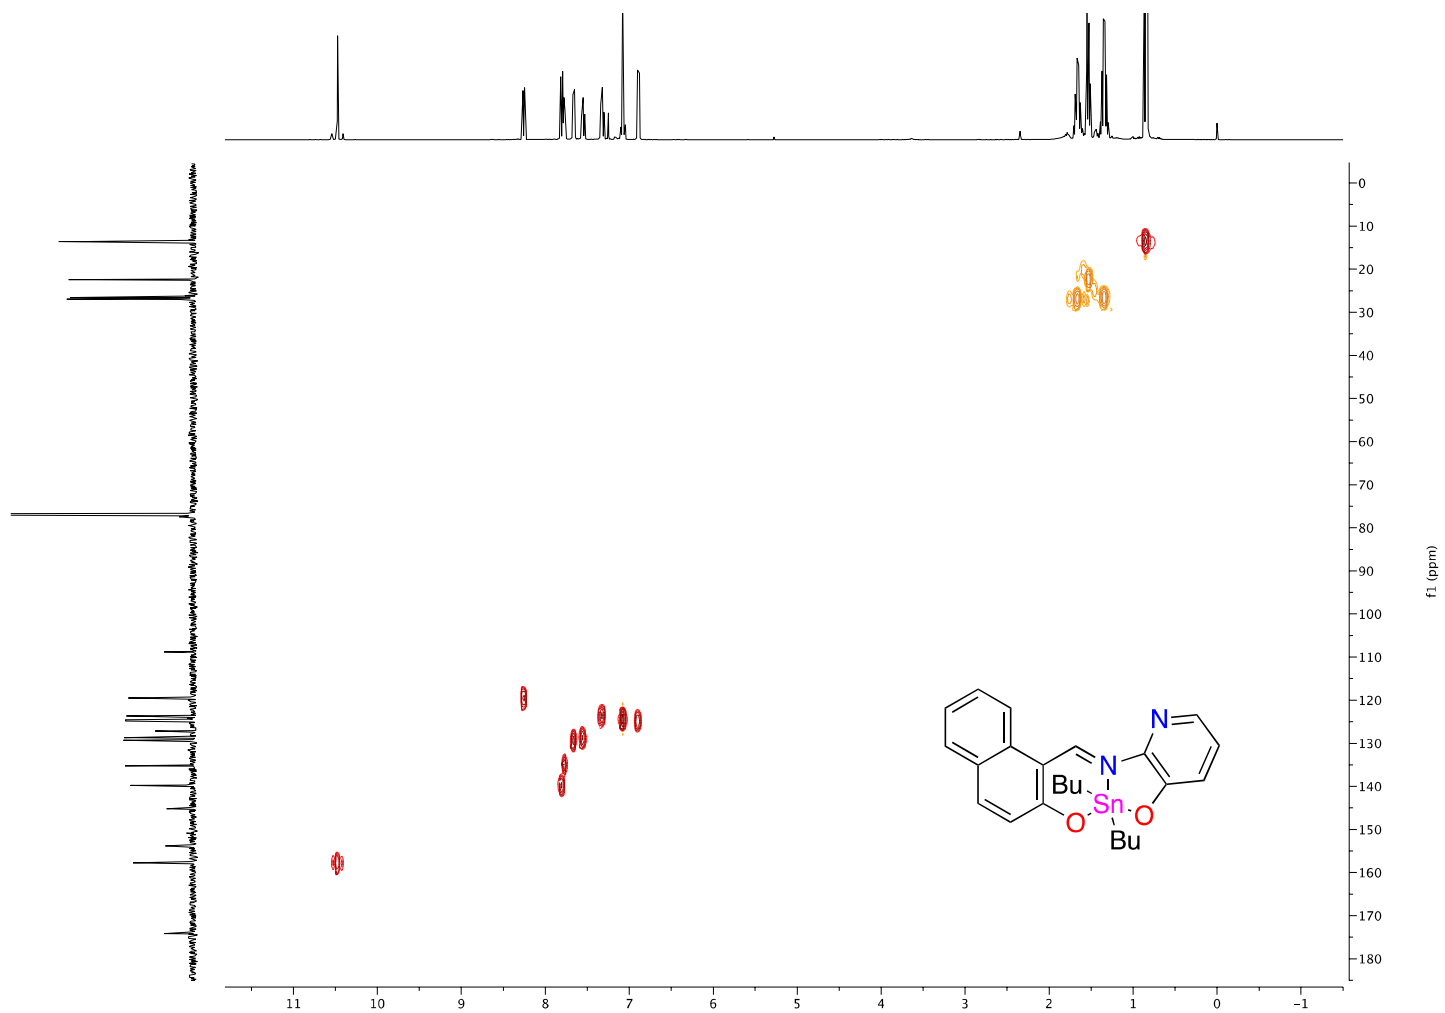

Figure S21. HSQC (CDCl<sub>3</sub>) of complex **1a**

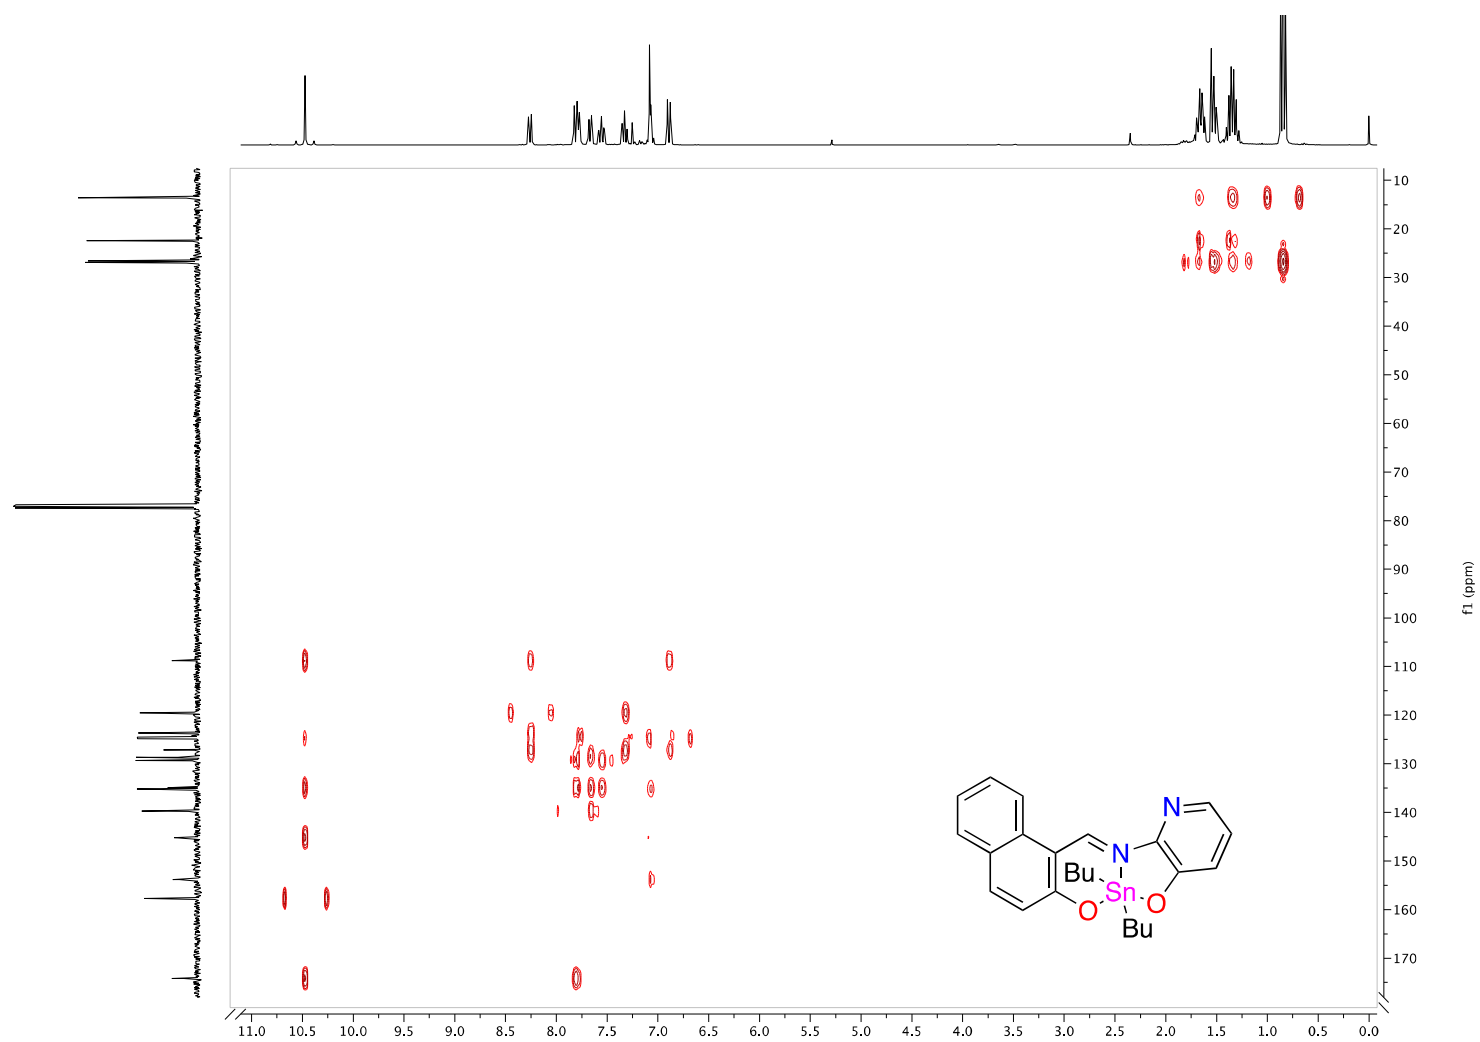

Figure S22. HMBC (CDCl<sub>3</sub>) of complex **1a**

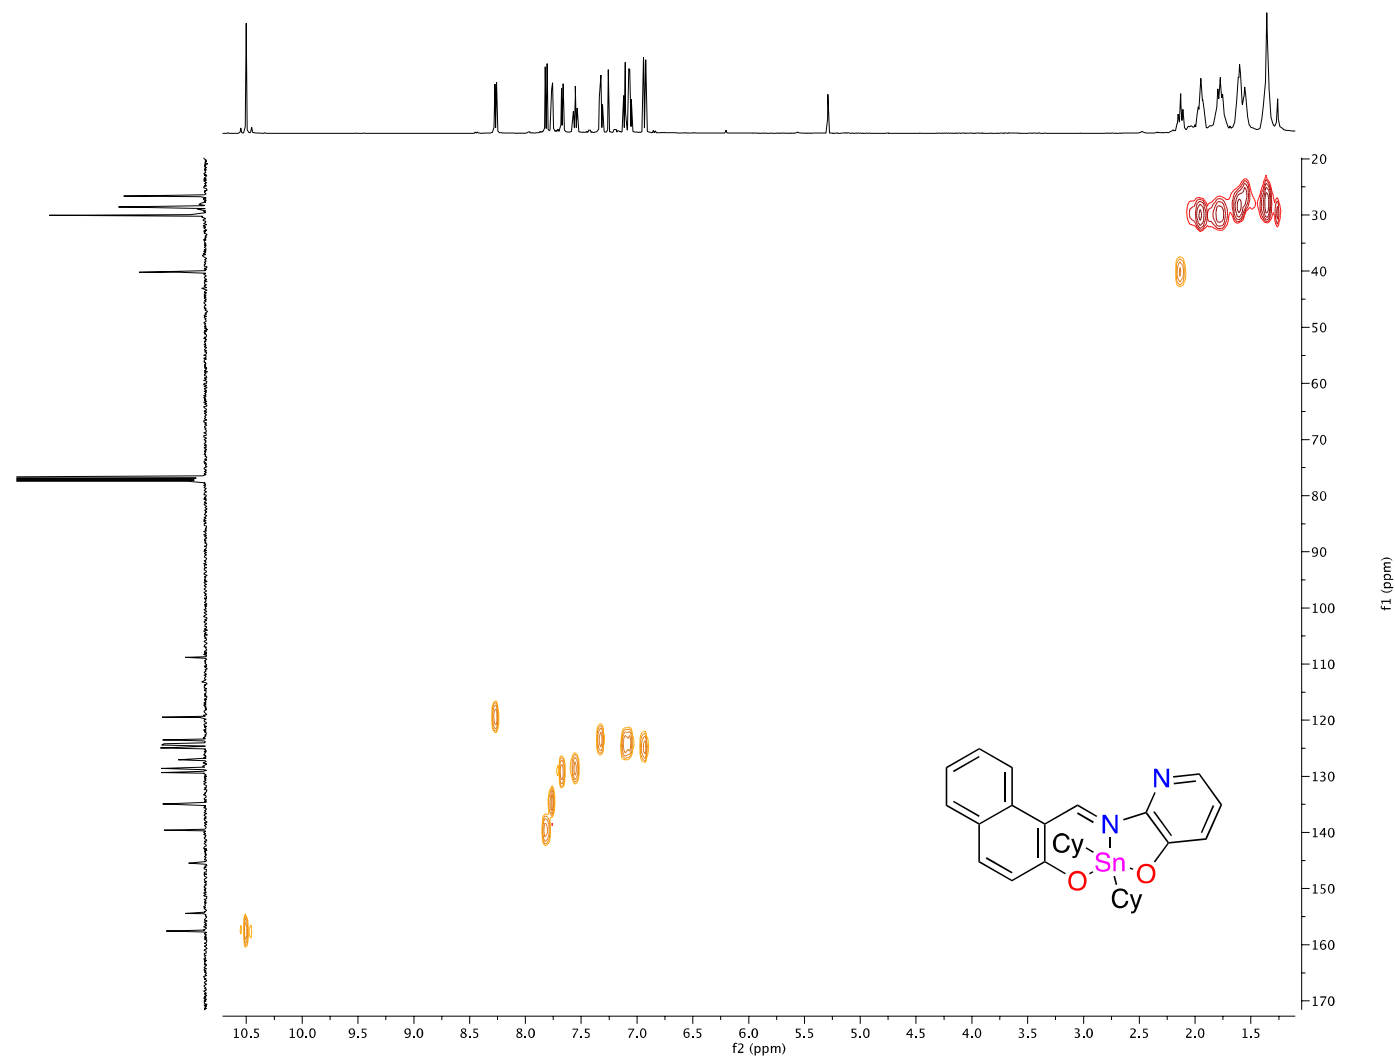

Figure S23. HSQC (CDCl<sub>3</sub>) of complex **1b**



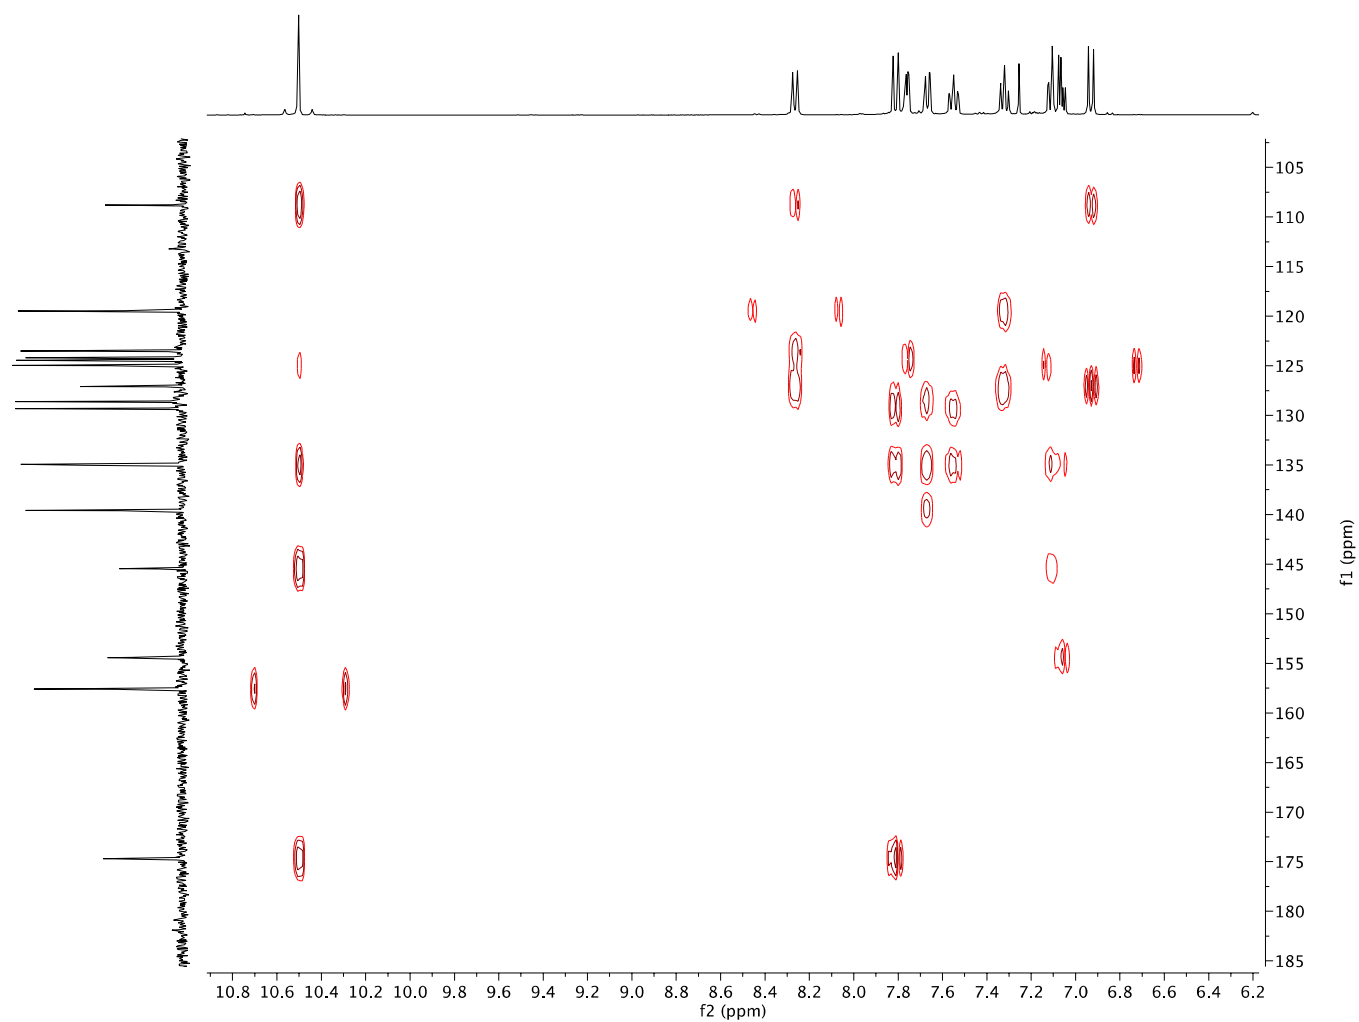

Figure S24. HMBC (CDCl<sub>3</sub>) of complex **1b**

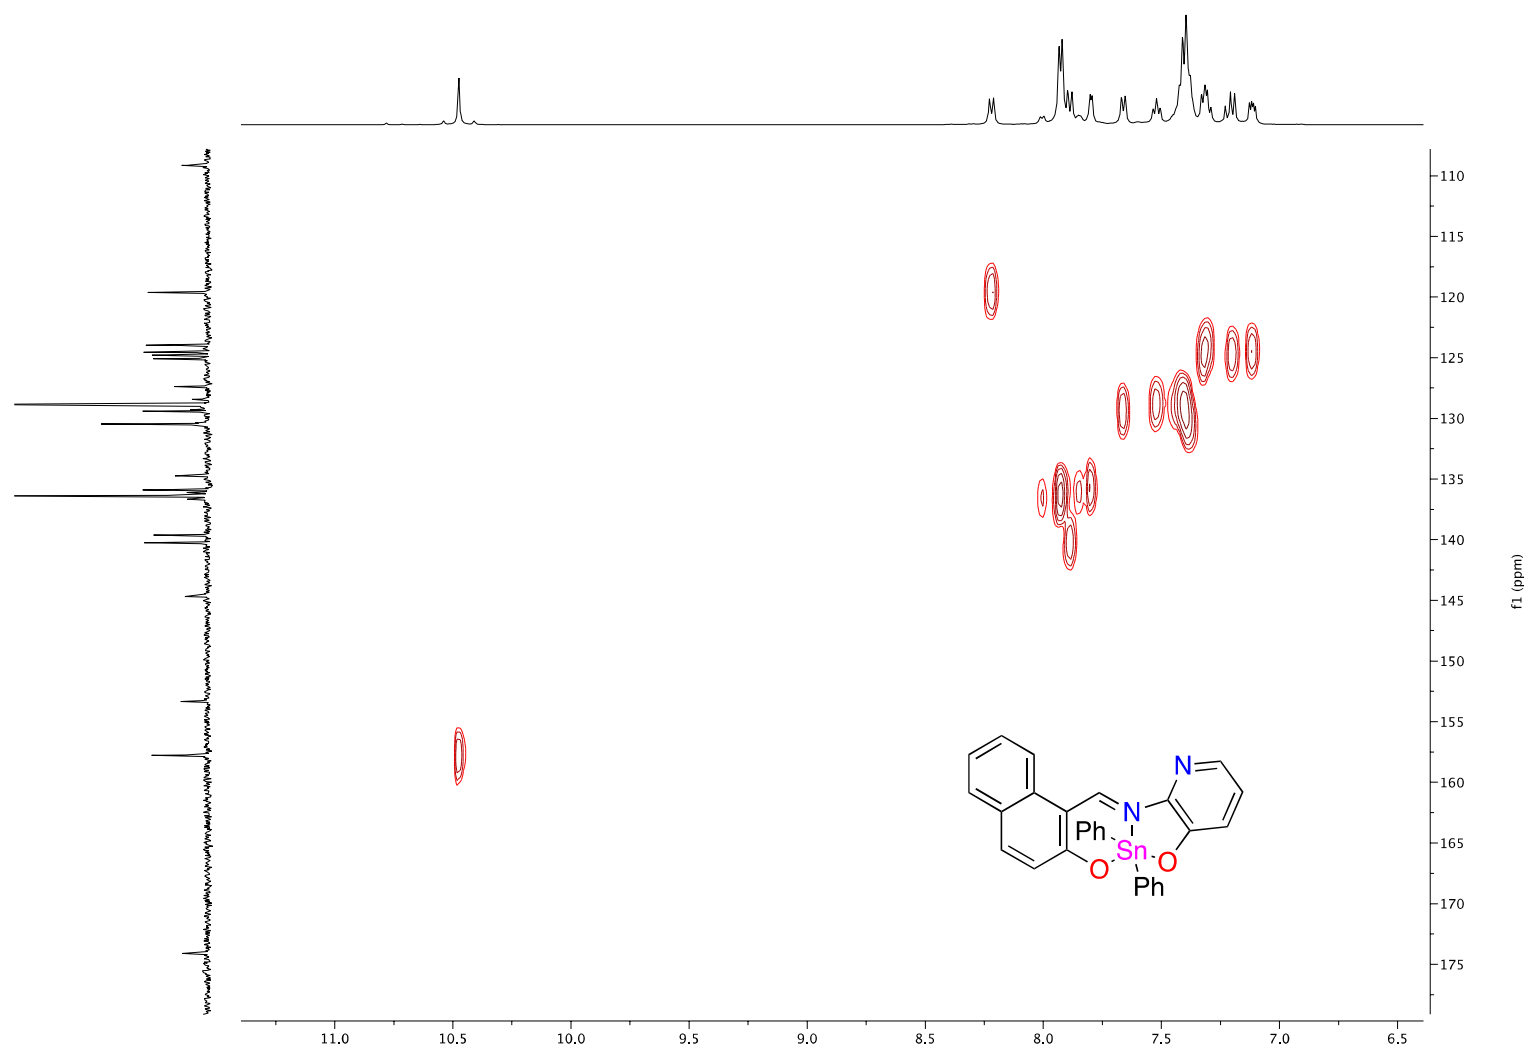

Figure S25. HSQC (CDCl<sub>3</sub>) of compound **1c**

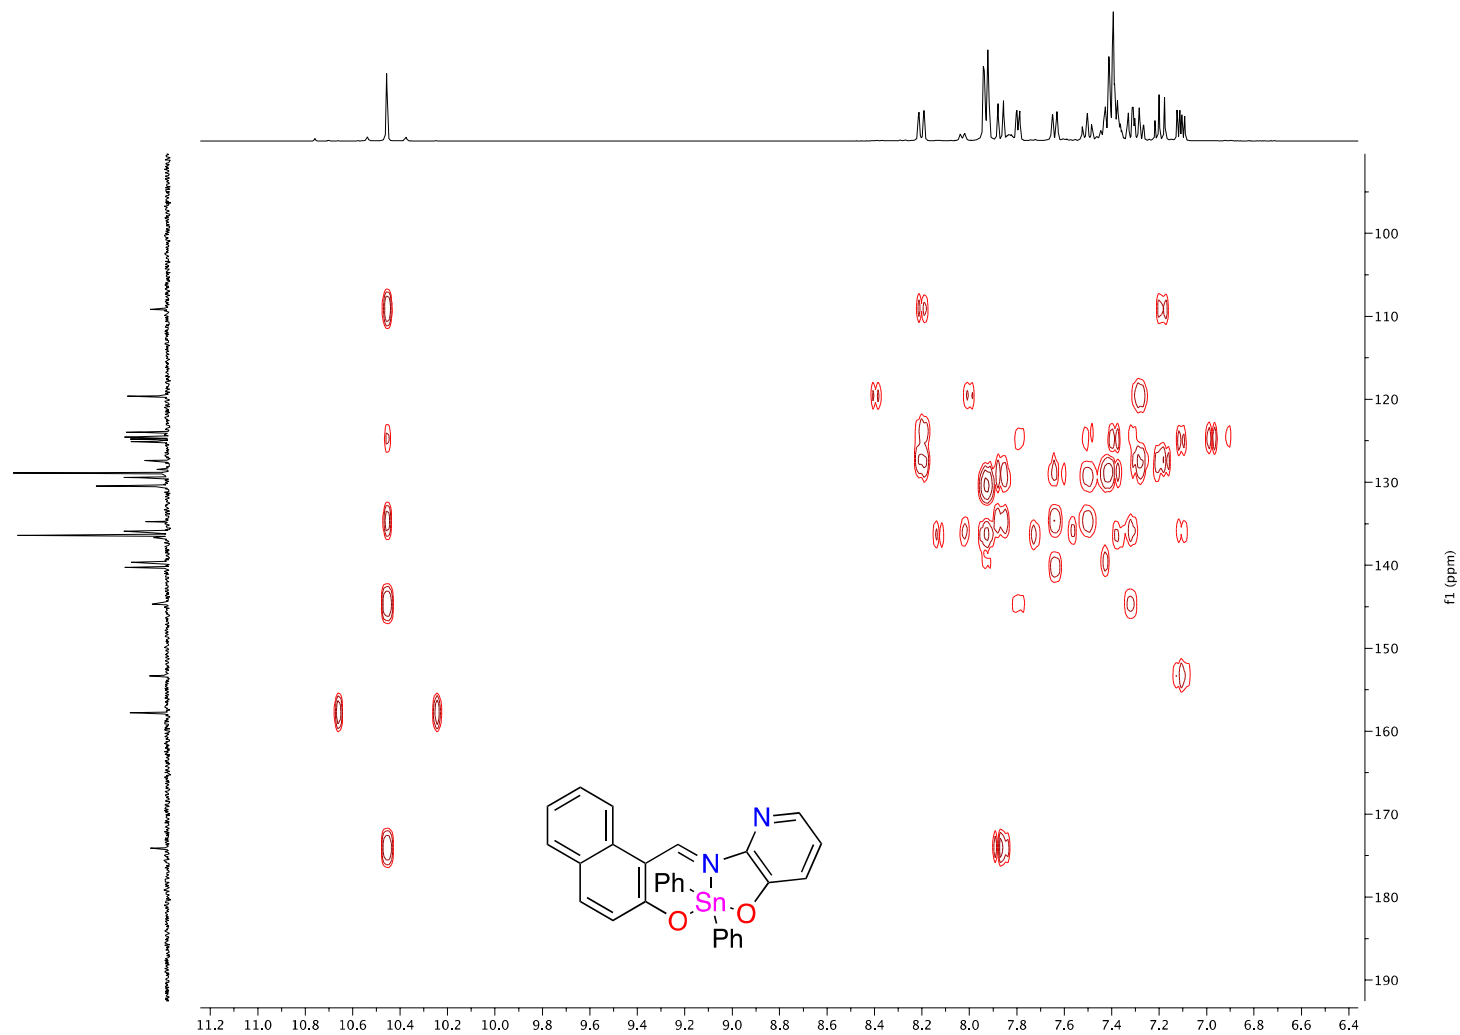

Figure S26. HMBC (CDCl<sub>3</sub>) of compound **1c**

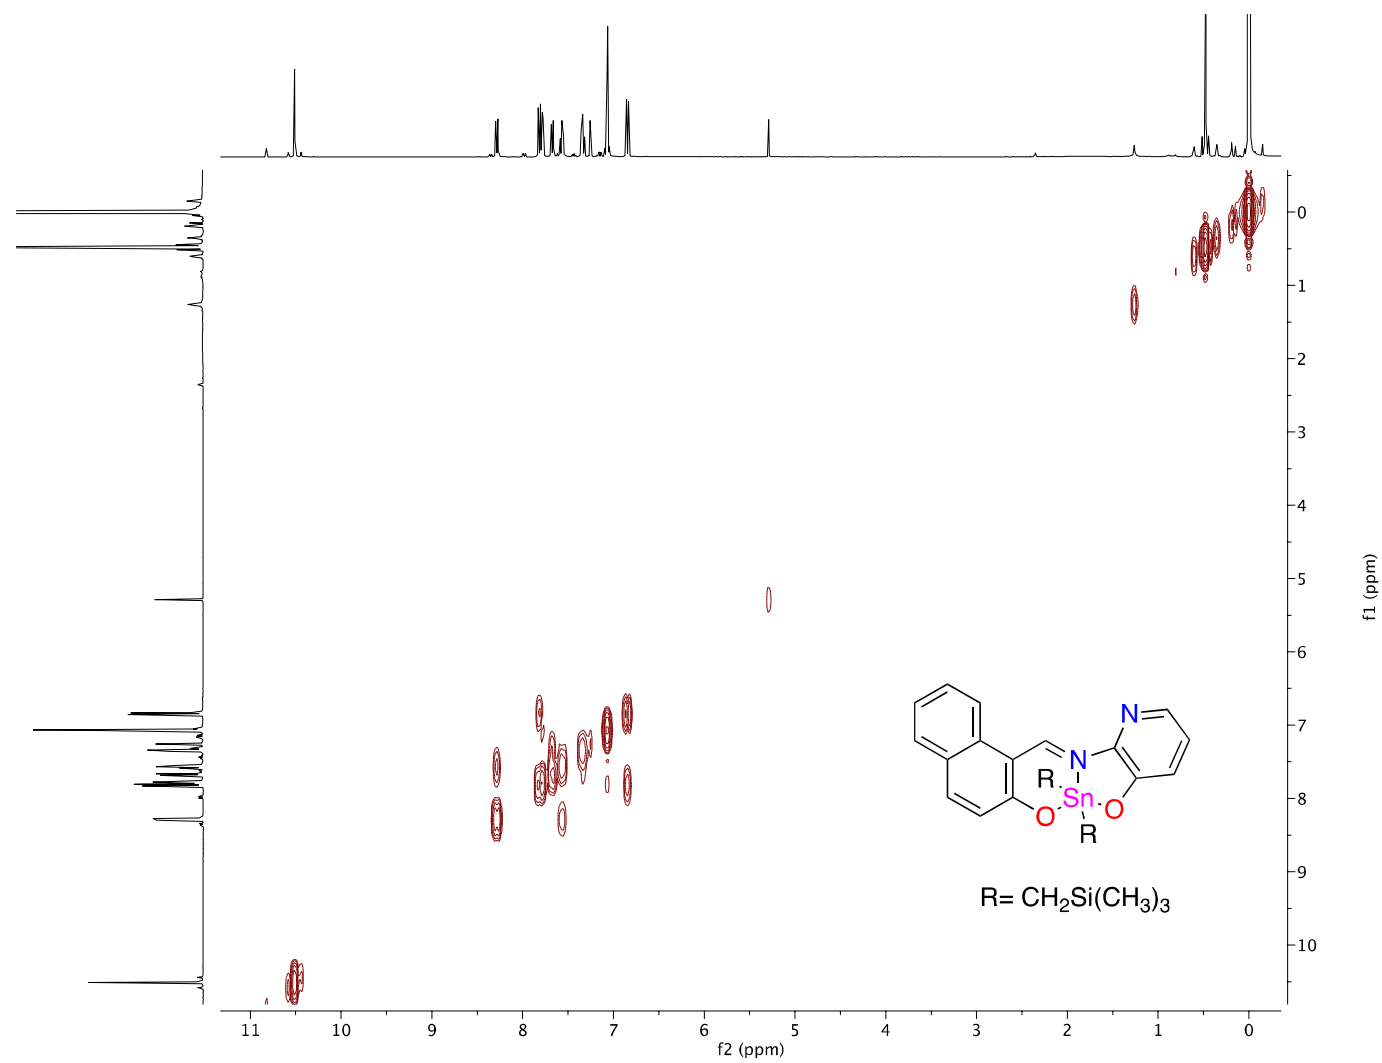

Figure S27. HSQC ( $\text{CDCl}_3$ ) of complex **1d**

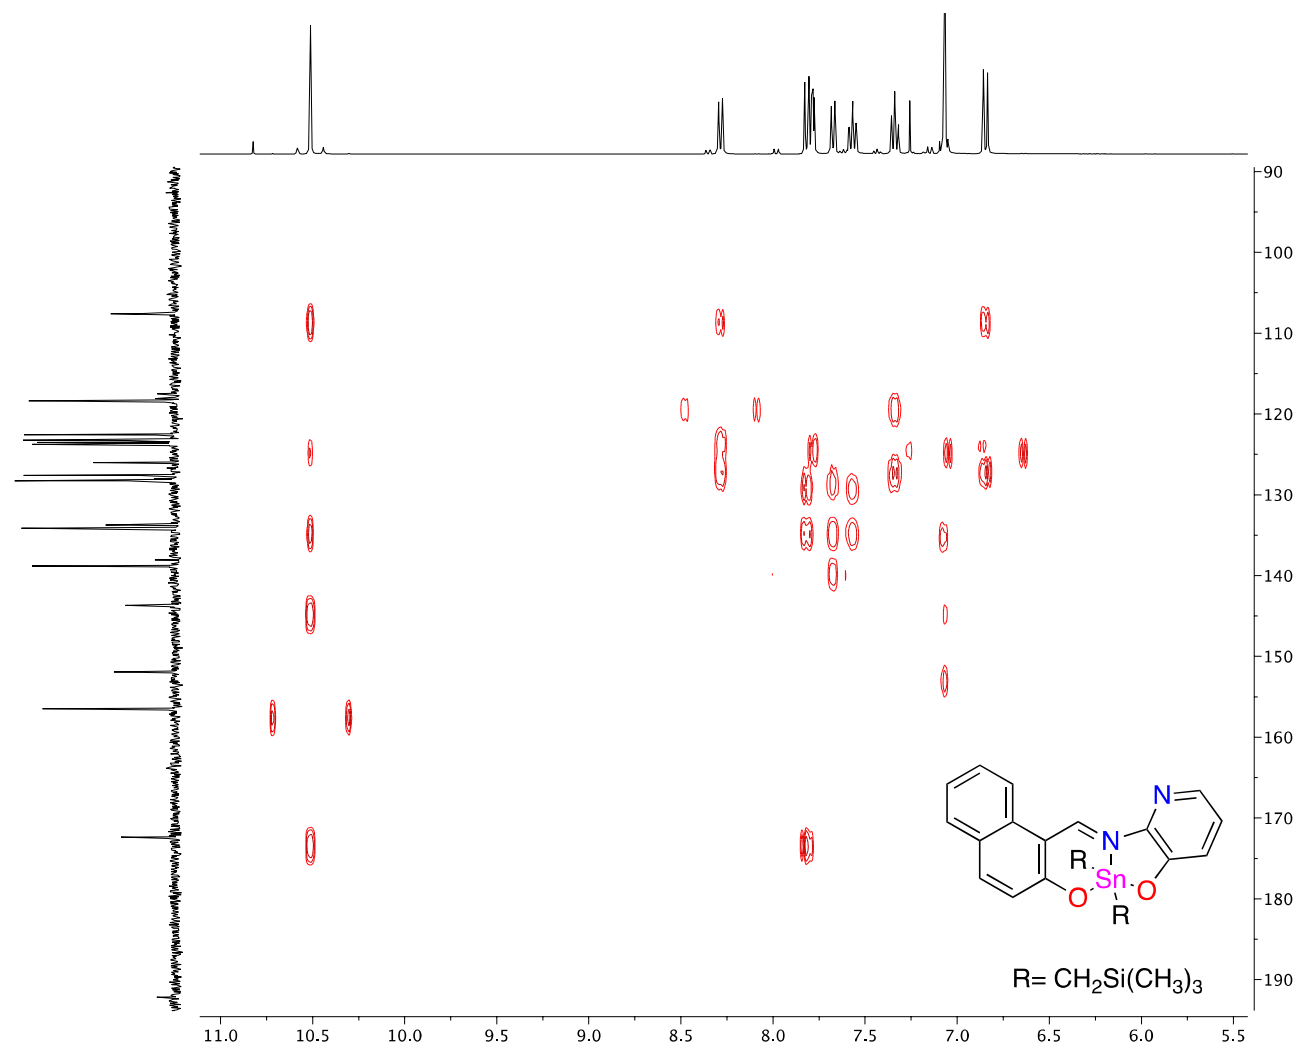

Figure S28. HMBC ( $\text{CDCl}_3$ ) of complex **1d**

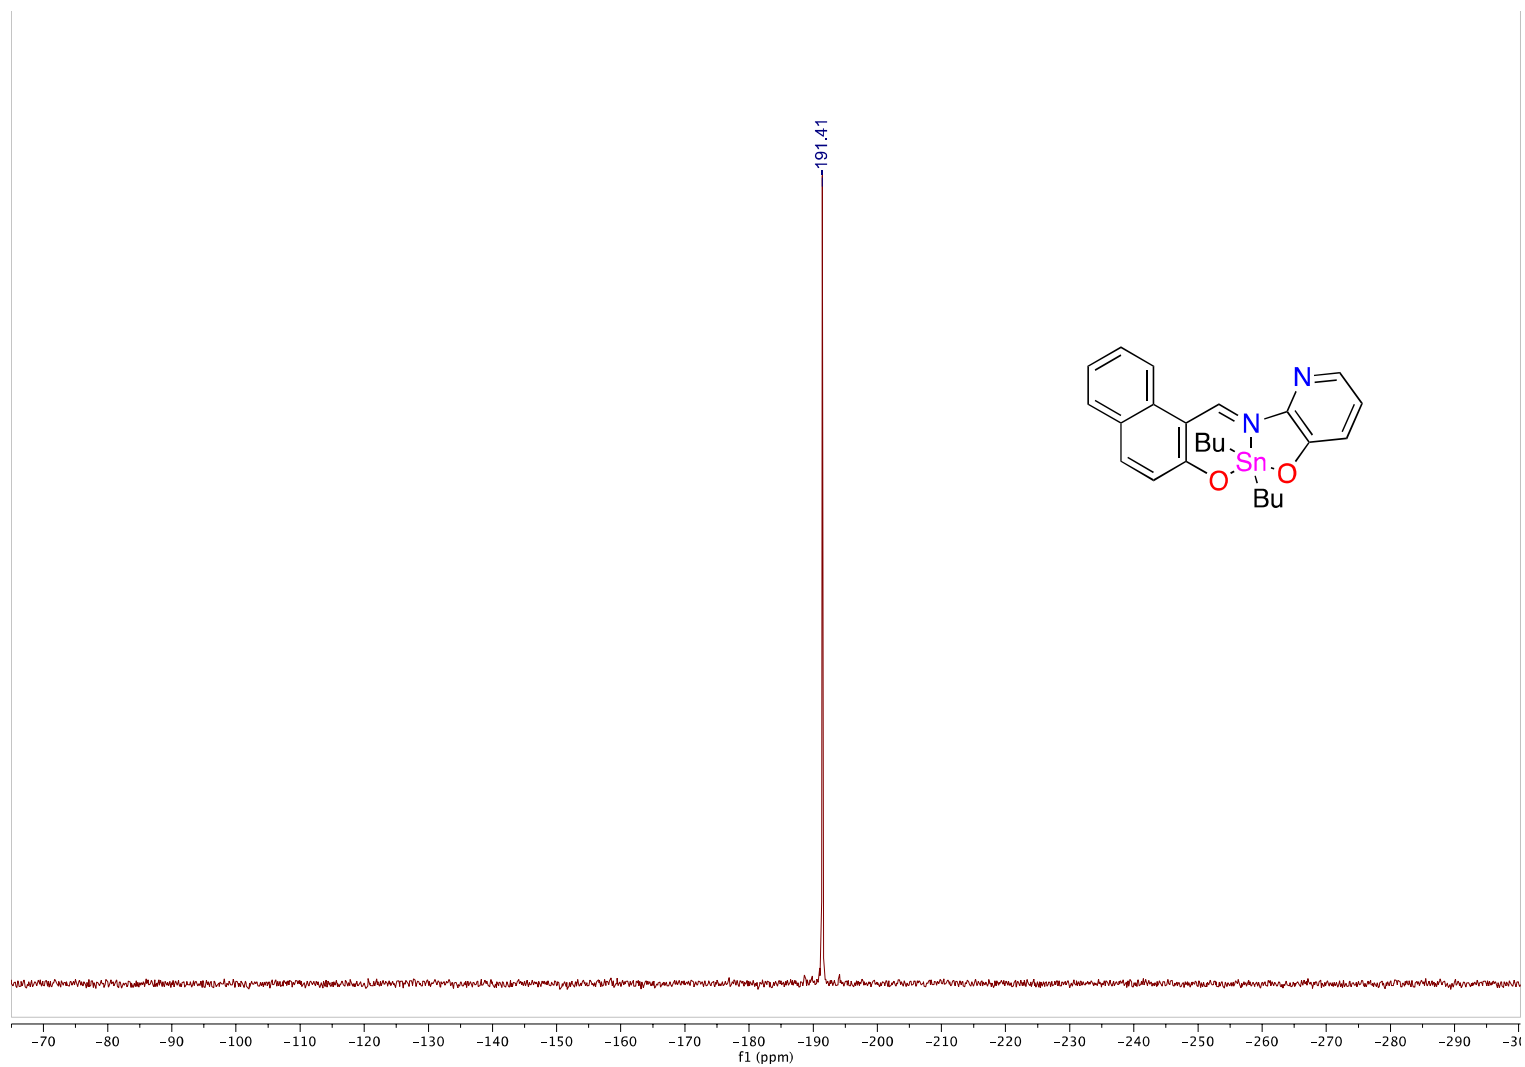

Figure S29.  $^{119}\text{Sn}$  NMR ( $\text{CDCl}_3$ , 112 MHz) of complex **1a**

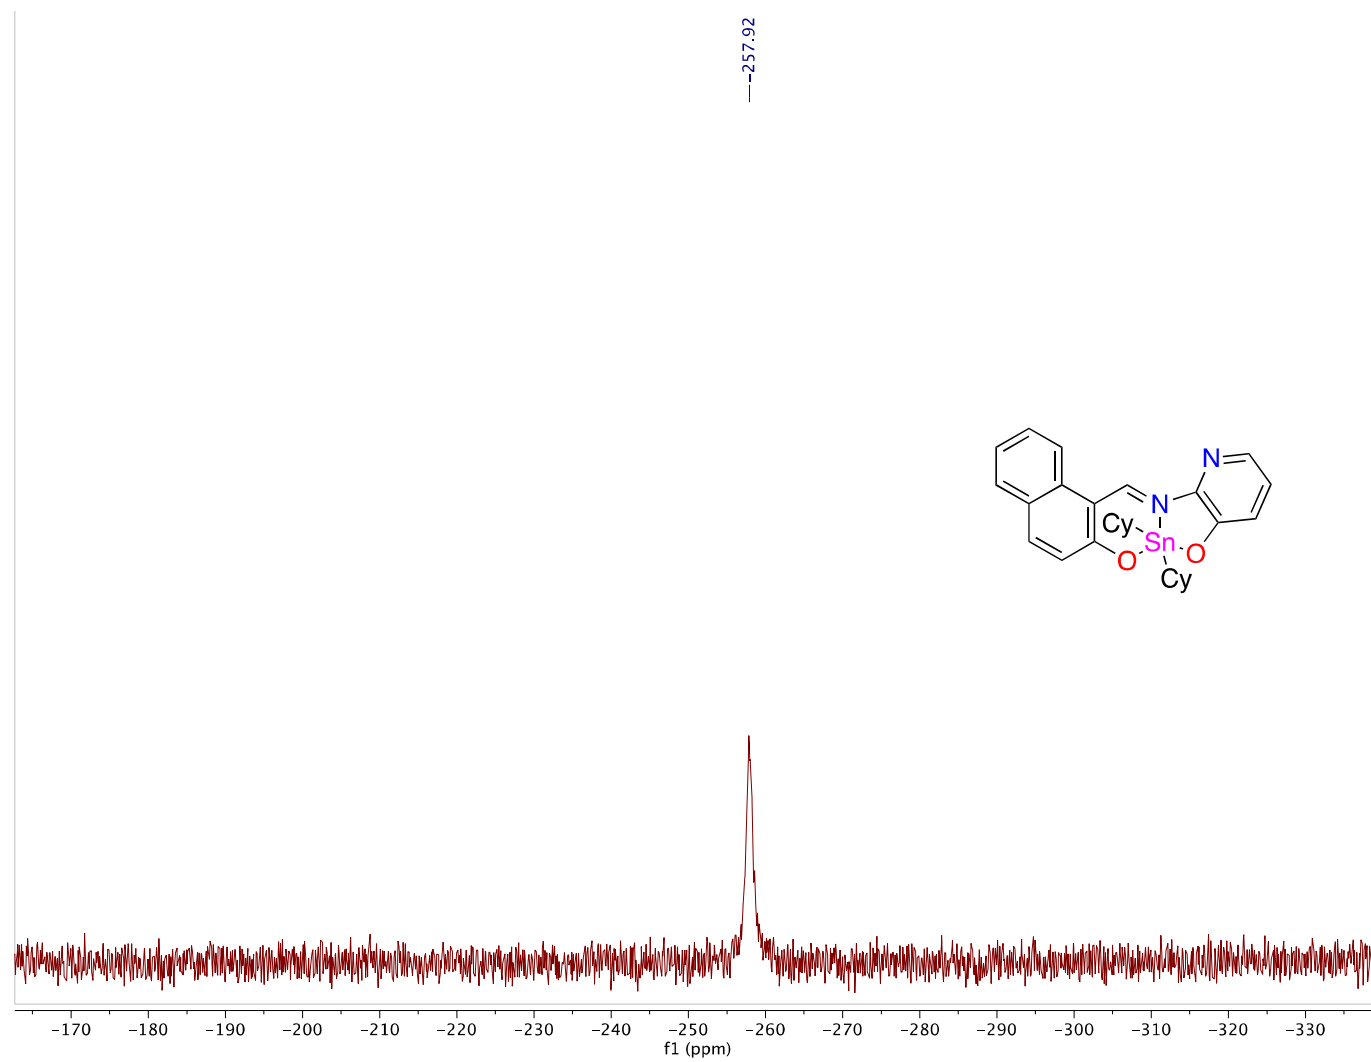

Figure S30.  $^{119}\text{Sn}$  NMR ( $\text{CDCl}_3$ , 112 MHz) of complex **1b**

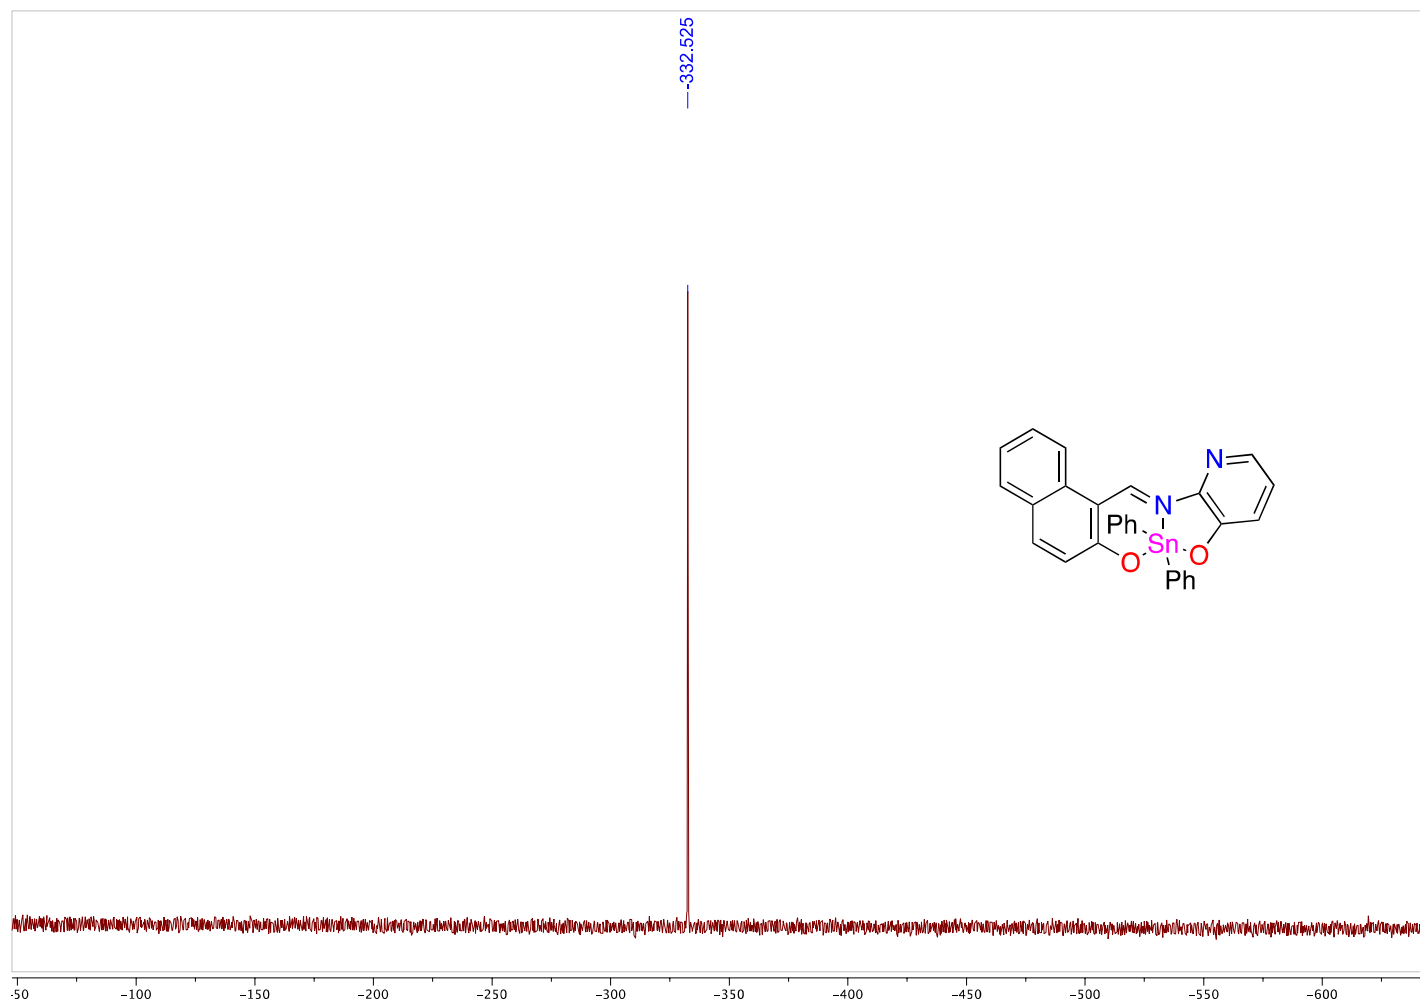

Figure S31.  $^{119}\text{Sn}$  NMR ( $\text{CDCl}_3$ , 112 MHz) of complex **1c**



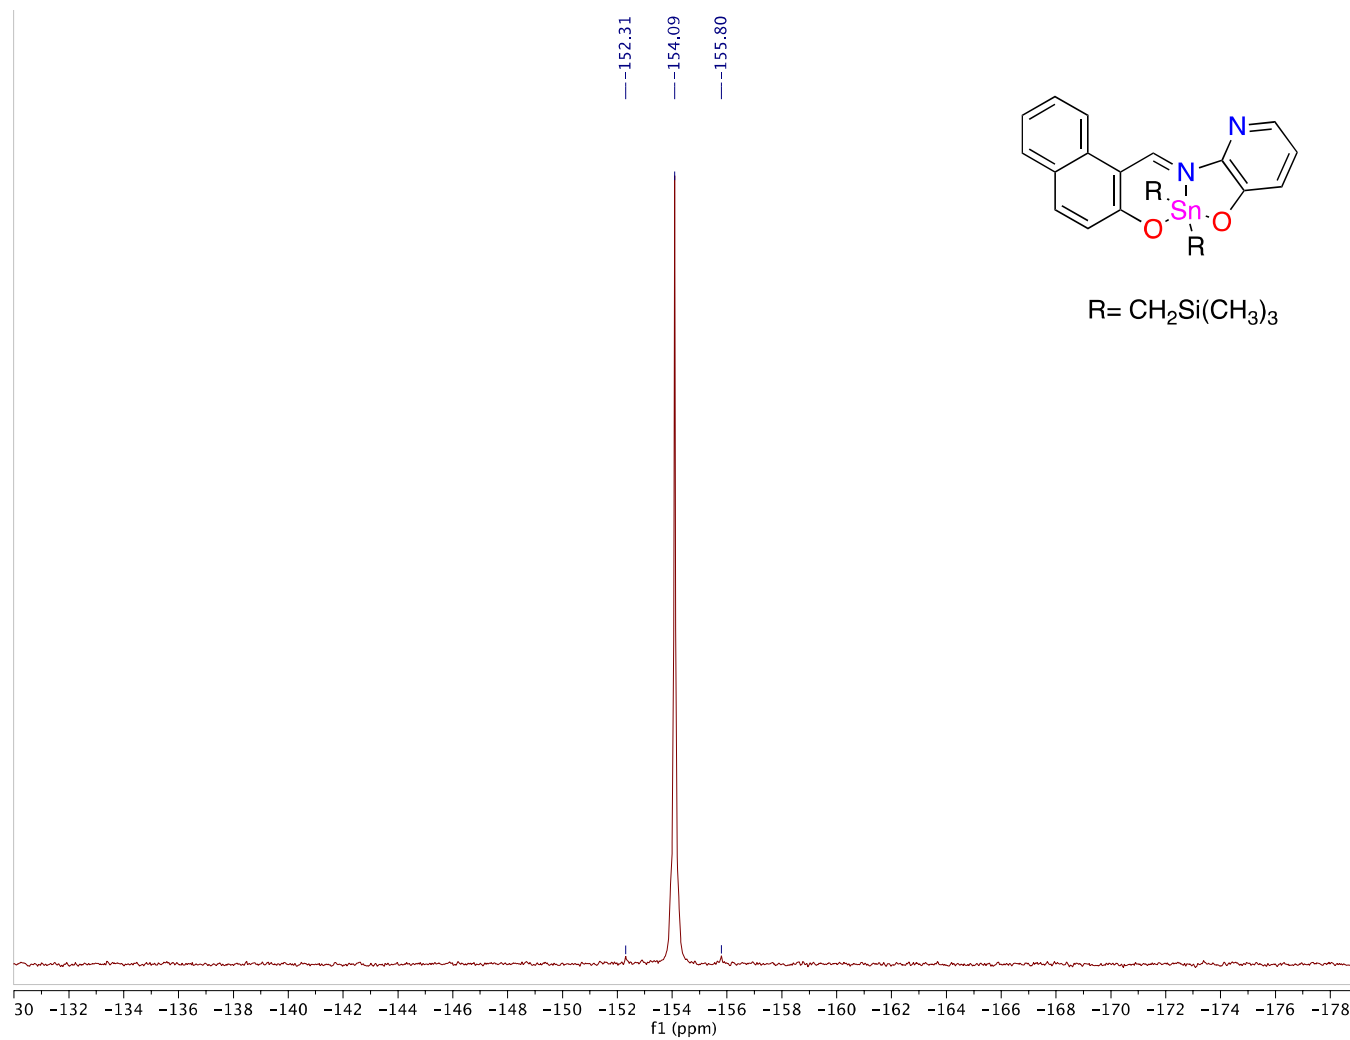

Figure S32.  $^{119}\text{Sn}$  NMR ( $\text{CDCl}_3$ , 112 MHz) of complex **1d**
